# Supplementary material for: Diselenide crosslinks for enhanced and simplified oxidative protein folding
Source: Springer Nature journal article supplement (doi:10.1038/s42004-021-00463-9), 2021-03-05
Supplement: MOESM1 [file 42004_2021_463_MOESM1_ESM.pdf]

# **Diselenide Crosslinks for Enhanced and Simplified Oxidative Protein Folding**

Reem Mousa, Taghreed Hidmi, Sergei Pomyalov, Shifra Lansky, Lareen Khouri, Deborah E. Shalev,  
Gil Shoham<sup>\*</sup>, and Norman Metanis<sup>\*</sup>

## **Supporting Information**

|    |                                                                                  |    |
|----|----------------------------------------------------------------------------------|----|
| 22 | <b>Table of Contents</b>                                                         |    |
| 23 | 1. Materials and Methods .....                                                   | 3  |
| 24 | 2. High Performance Liquid Chromatography (HPLC) .....                           | 3  |
| 25 | 3. Mass Spectrometry (MS) and HR-MS .....                                        | 4  |
| 26 | 4. Experimental section .....                                                    | 4  |
| 27 | 4.1. Peptide synthesis.....                                                      | 4  |
| 28 | Synthesis of Hir(39-65) .....                                                    | 5  |
| 29 | Synthesis of Hir(39-65)(C39U) .....                                              | 6  |
| 30 | Synthesis of Hir(1-38)-COSR, Hir(1-38)(C6U/C14U)-COSR, Hir(1-38)(C16U/C28U)-COSR |    |
| 31 | and Hir(1-38)(C22U)-COSR .....                                                   | 7  |
| 32 | Non-native Hir(1-38)(C6U/C16U)-Nbz .....                                         | 12 |
| 33 | 4.2. Native chemical ligations (NCL).....                                        | 14 |
| 34 | 4.3. Oxidative folding.....                                                      | 22 |
| 35 | 4.4. X-Ray crystallography .....                                                 | 24 |
| 36 | Crystallization and crystallographic data collection.....                        | 24 |
| 37 | The Hir(C16U/C28U)-Thrombin complex (Complex-1) .....                            | 24 |
| 38 | The Hir(C6U/C14U)-Thrombin complex (Complex-2) .....                             | 25 |
| 39 | The Hir(C22U/C39U)-Thrombin complex (Complex-3) .....                            | 25 |
| 40 | Supplementary discussion-Further structural analysis .....                       | 28 |
| 41 | Overall structures.....                                                          | 28 |
| 42 | The diselenide bonds and their environments .....                                | 29 |
| 43 | Intramolecular hydrogen bonds within the Se-Hir structures.....                  | 31 |
| 44 | Intermolecular hydrogen bonds between the Se-Hir analogs and Thrombin .....      | 36 |
| 45 | RMS deviation by residue .....                                                   | 39 |
| 46 | Implications on structural differences .....                                     | 40 |
| 47 | 4.5. 2 D-NMR of WT-Hir and Hir(C6U/C14U).....                                    | 42 |
| 48 | 4.6. Inhibition assays .....                                                     | 43 |
| 49 | 5. HR-MS results .....                                                           | 45 |
| 50 |                                                                                  |    |
| 51 |                                                                                  |    |
| 52 |                                                                                  |    |
| 53 |                                                                                  |    |

## 54 **Supplementary methods**

### 55 **1. Materials and Methods**

56

57 Buffers for both ligation reactions and kinetic experiments were prepared using MilliQ water  
58 (Millipore, Merck). Ultrapure guanidinium chloride (Gn·HCl, MP Biomedicals, LLC, France) was used  
59 in all ligation buffers. Na<sub>2</sub>HPO<sub>4</sub>·12H<sub>2</sub>O, tris(2-carboxyethyl)phosphine hydrochloride (TCEP·HCl), 4-  
60 mercaptophenylacetic acid (MPAA), 2,2'-Dithiobis (5-nitropyridine) (DTNP), sodium ascorbate, *D,L*-  
61 dithiothreitol (DTT), triisopropylsilane (TIPS), acetylacetone (Acac), oxidized *L*-Glutathione (GSSG),  
62 *N*-Benzoyl-Phe-Val-Arg-*p*-nitroanalide hydrochloride, thrombin from bovine plasma were purchased  
63 from Merck (Jerusalem, Israel). All Fmoc-amino acids were obtained from CS Bio Co. (Menlo Park,  
64 CA) or Matrix innovation (Quebec City, Canada), with the following side chain protecting groups:  
65 Arg(Pbf), Asp(OtBu), Glu(OtBu), Ser(tBu), Thr(tBu), Cys(Trt), Lys(Boc), Tyr(tBu), Asn(Trt). (Pbf =  
66 2,2,4,6,7- pentamethyl-2,3-dihydrobenzofuran-5-sulfonyl). TentaGel® R RAM resin (loading 0.18  
67 mmol/g), Fmoc-Gln(Trt)-Wang resin (loading 0.19 mmol/g) and chlorotriptyl resin (loading 1.8 mmol/g)  
68 were purchased from Rapp Polymer GmbH (Germany), GL Biochemical (China) or Chem-Impex  
69 (USA). *N,N,N',N'*-Tetramethyl-O-(6-chloro-1H-benzotriazol-1-yl)uronium hexafluorophosphate  
70 (HCTU) and Ethyl cyano(hydroxyimino)acetate (OxymaPure) were purchased from Luxembourg  
71 Biotechnologies Ltd. (Rehovot, Israel). All solvents: *N,N*-dimethylformamide (DMF), dichloromethane  
72 (DCM), acetonitrile (ACN), *N,N*-diisopropylethyl amine (DIEA), piperidine (Pip), diethyl ether (Et<sub>2</sub>O)  
73 and trifluoroacetic acid (TFA) were purchased from Bio-Lab (Jerusalem, Israel) and were peptide  
74 synthesis, HPLC or ULC-grade. Fmoc-Sec(MoB)-OH was synthesised as reported previously.<sup>[1]</sup>

75

### 76 **2. High Performance Liquid Chromatography (HPLC)**

77 The analytical analyses were performed on a reverse-phase Waters Alliance HPLC with UV detector  
78 (220 nm and 280 nm) using an X-Bridge C4 column (300 Å, 3.5 µm, 4.6 × 150 mm) and an Atlantis T3  
79 column (3 µm, 4.6 × 150 mm). Preparative and semi-preparative RP-HPLC was performed on a Waters  
80 LCQ150 system using XSelect C18 column (130 Å, 5 µm, 30 × 250 mm), X-Bridge BEH C4 (300 Å, 5  
81 µm 19 × 150 mm) and X-Bridge BEH C4 (300 Å, 5 µm, 10 × 150 mm). Linear gradients of acetonitrile  
82 with 0.1% TFA (buffer B) and water with 0.1% TFA (buffer A) were used for all systems to elute

bound peptides. The flow rates were 1 mL/min (analytical), 3.34 mL/min (semi-preparative), 10 mL/min and 20 mL/min (C4 preparative and C18 preparative, respectively).

### 3. Mass Spectrometry (MS) and HR-MS

MS was performed on Thermo Scientific-LCQ Fleet Ion-Trap mass spectrometer. Peptide masses were calculated from the experimental mass to charge (m/z) ratios from the observed multiply charged species of a peptide using MagTran v1.03.

The HR-MS were recorded on a Q-ExactivePlus Orbitrap mass spectrometer (Thermo Scientific) with a ESI source and 140'000 FWHM, in a method with AGC target set to 1E6, and scan range was 400-2800 m/z. The raw data was deconvoluted by MagTran v1.03 software.

## 4. Experimental section

### 4.1. Peptide synthesis

#### General procedure for Fmoc-SPPS

Peptides were prepared manually or using an automated peptide synthesizer (CS136XT, CS Bio Inc. CA) typically on 0.25 mmol scale. Fmoc-amino acids (2 mmol) were activated with HCTU (2 mmol) and DIEA (4 mmol) for 5 min and coupled for 25 min, with constant shaking. Fmoc deprotection step was carried out with 20% piperidine in DMF for 2 x 5 min, and DMF was used for washing the resin. Fmoc-Sec(Mob)-OH was coupled manually using DIC/OxymaPure activation method.<sup>[1]</sup>

#### The sequence of Hirudin variant-1; UniProt - P01050

|  |            |            |            |                            |             |            |
|--|------------|------------|------------|----------------------------|-------------|------------|
|  | 10         | 20         | 30         | 40                         | 50          | 60         |
|  | VVYTDCTESG | QNLCLCEGSN | VCGQGKNCIL | GSDGEKN <u><b>QC</b></u> V | TGEGTPKPKQS | HNDGDFEEIP |
|  | EEYLQ      |            |            |                            |             |            |

WT-Hirudin (WT-Hir) and its seleno-hirudin analogs were synthesised using two segments and one ligation reaction. The ligation site is in bold and underlined. The detailed syntheses of the segments and ligation reaction are described below.

109

110 **Synthesis of Hir(39-65)**

111

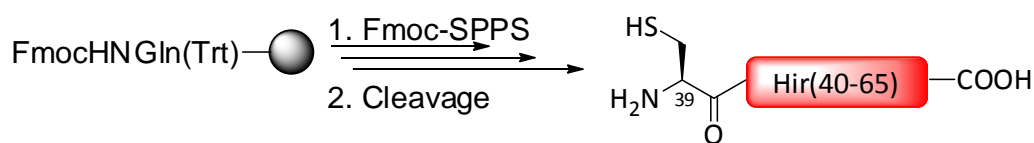

112

**Scheme S1.** Total chemical synthesis of Hir(39-65) by SPPS.

113 The synthesis of Hir(39-65) was carried out on Fmoc-Gln(Trt)-wang resin (0.19 mmol/g, 0.25 mmol  
 114 scale) on an automated peptide synthesizer. Gly34 was manually coupled as Fmoc-(Dmb)Gly-OH (2.5  
 115 equiv Fmoc-(Dmb)Gly-OH,<sup>[2]</sup> 2.5 equiv HCTU and 5 equiv DIEA) and Asp33 was double coupled.  
 116 Following the SPPS the peptide was cleaved and deprotected using TFA: TIPS: water (95: 2.5: 2.5).  
 117 The peptide was purified using RP-HPLC (C18 column) to give pure fragment of Hir(39-65) in ~20 %  
 118 yield (Scheme S1, Figure S1).

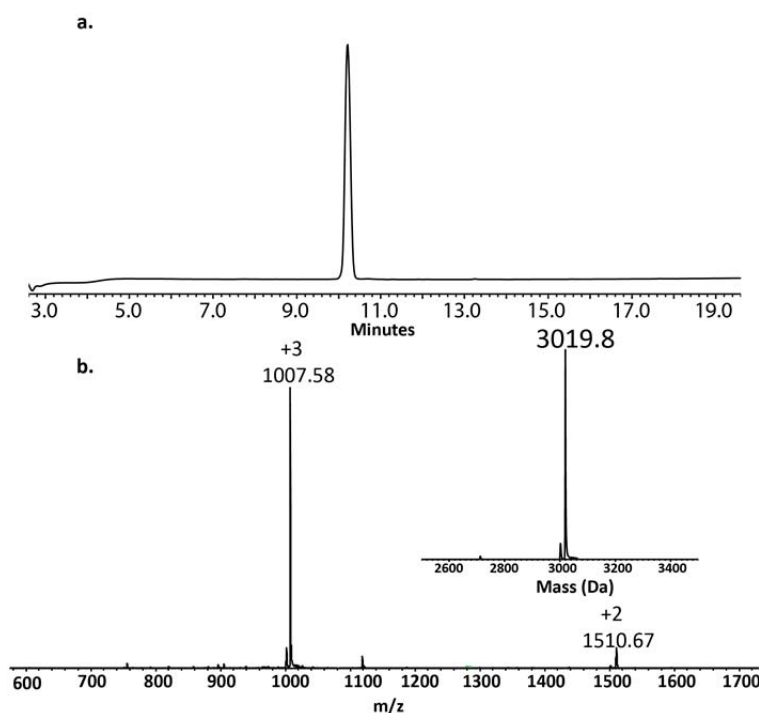

119

120 **Figure S1.** Characterization of the Hir(39-65) segment. **a.** HPLC analysis (220 nm); **b.** Corresponding  
 121 ESI-MS, with its deconvoluted mass (inset) (obs. average  $3019.8 \pm 0.3$  Da, calc. Da 3020.1)

122

123

124 **Synthesis of Hir(39-65)(C39U)**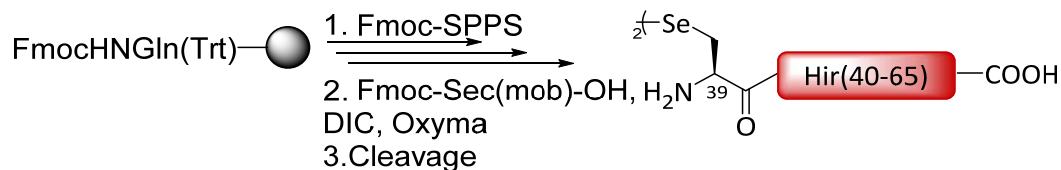

125

126 **Scheme S2.** Total chemical synthesis of Hir(39-65)(C39U) by SPPS

127 The synthesis of Hir(39-65)(C39U) was done in the same fashion as described for Hir(39-65). The Sec  
128 at position 39 was manually double coupled for 2 h (3.0 equiv Fmoc-Sec(Mob)-OH activated on ice for  
129 5 min using 3.0 equiv OxymaPure and 2.9 equiv DIC) and treated with 20% of piperidine for Fmoc  
130 final deprotection<sup>[3]</sup>. The peptide was cleaved and purified to give Hir(39-65)(C39U) at ~13 % yield of  
131 pure peptide (Scheme S2, Figure S2). This analog was isolated as a dimer after HPLC purification,  
132 since it does not contain other Cys or Sec residues in its sequence. For analytical HPLC run, we treated  
133 a small amount of the peptide with TCEP and sodium ascorbate, which reduces the diselenide bonds, as  
134 is shown in Fig. S2.

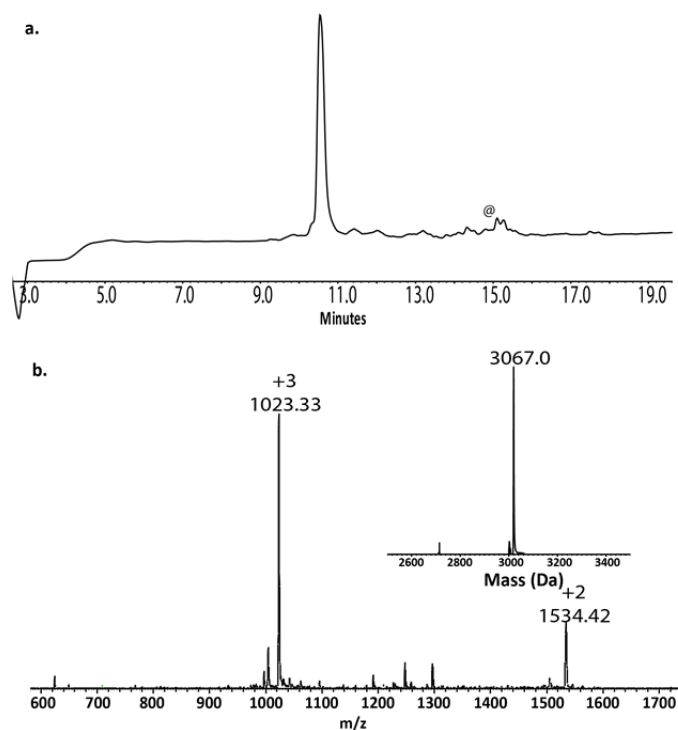

135

136 **Figure S2.** Characterization of the Hir(39-65)(C39U) segment. **a.** Analytical HPLC analysis (220 nm);  
137 **b.** The corresponding ESI-MS, with its deconvoluted mass (inset) (obs. average  $3067.0 \pm 0.1$  Da, calc.

Da 3067.0). @ is corresponds to column impurities. For this run, the peptide was treated with TCEP and sodium ascorbate to keep it in the reduced form.

### Synthesis of Hir(1-38)-COSR, Hir(1-38)(C6U/C14U)-COSR, Hir(1-38)(C16U/C28U)-COSR and Hir(1-38)(C22U)-COSR

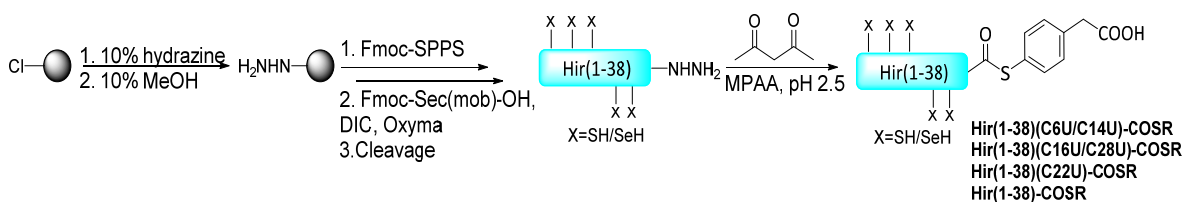

**Scheme S3.** Total chemical synthesis of Hir(1-38)-COSR, Hir(1-38)(C6U/C14U)-COSR, Hir(1-38)(C16U/C28U)-COSR and Hir(1-38)(C22U)-COSR by SPPS

The synthesis Hir(1-38)(C6U/C14U)-COSR, was carried out on Chlorotrityl resin, on a 0.25 mmol scale (1.8 mmol/g) was swelled in DMF for 1 h and treated twice with freshly prepared 10% hydrazine in DMF for 30 min and decanted.<sup>[4]</sup> The resin was washed well with DMF and then treated with 10% MeOH in DMF for 30 min. The hydrazide functionalized chlorotrityl resin was used for standard Fmoc-SPPS where the coupling of the amino acids held on an automated synthesizer. Gly34 was manually coupled as (Dmb)Gly (2.5 equiv Fmoc-(Dmb)Gly-OH,<sup>[2]</sup> 2.5 equiv HCTU and 5 equiv DIEA) and Asp33 was double coupled. Sec6 and Sec14 was manually coupled for 2 h (3.0 equiv Fmoc-Sec(Mob)-OH activated on ice for 5 min using 3.0 equiv OxymaPure and 2.9 equiv DIC). The cleavage was done in the presence of 2 equiv of DTNP,<sup>[5]</sup> using TFA:water:thioanisole (94:3:3) cocktail for 3-4 h.

The conversion to thioester was done by dissolving the peptide in PB buffer (200 mM, 6 M Gn·HCl, pH ~2.5) and treated with 50 equiv of acetylacetone (acac) and 200 equiv of MPAA for 4 h at room temperature.<sup>[6]</sup> Purification by RP-HPLC (C4 column) yielded ~4.3 % of pure peptide (Scheme S3, Figure S3).

Using the same manner, peptide Hir(1-38)(C16U/C28U)-COSR (Sec was substituted at position 16 and 28) and Hir(1-38)(C22U)-COSR (Sec substituted at position 22), were synthesised and purified to give ~6.6% and ~2% of pure peptide, respectively (Scheme S3, Figures S4 and S5).

The synthesis of Hir(1-38)-COSR followed the same procedure mentioned above (no Sec substitution) to yield 7.5% of pure peptide (Scheme S3, Figure S6).

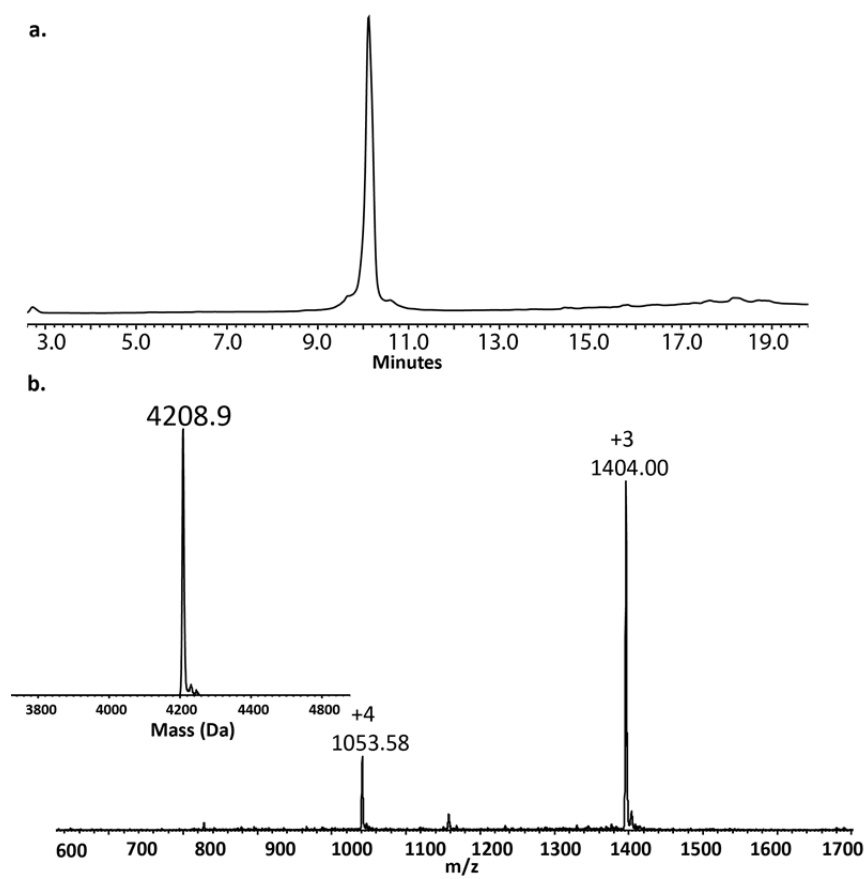

164

165 **Figure S3.** Characterization of the Hir(1-38)(C6U/C14U)-COSR segment. **a.** Analytical HPLC  
 166 analysis of purified Hir(1-38)(C6U/C14U)-COSR (220 nm); **b.** The corresponding ESI-MS, with its  
 167 deconvoluted mass (inset) (obs. average  $4208.9 \pm 0.5$  Da, calc. 4209.3 Da). The peptide was purified  
 168 with single diselenide crosslink and three reduced thiols.

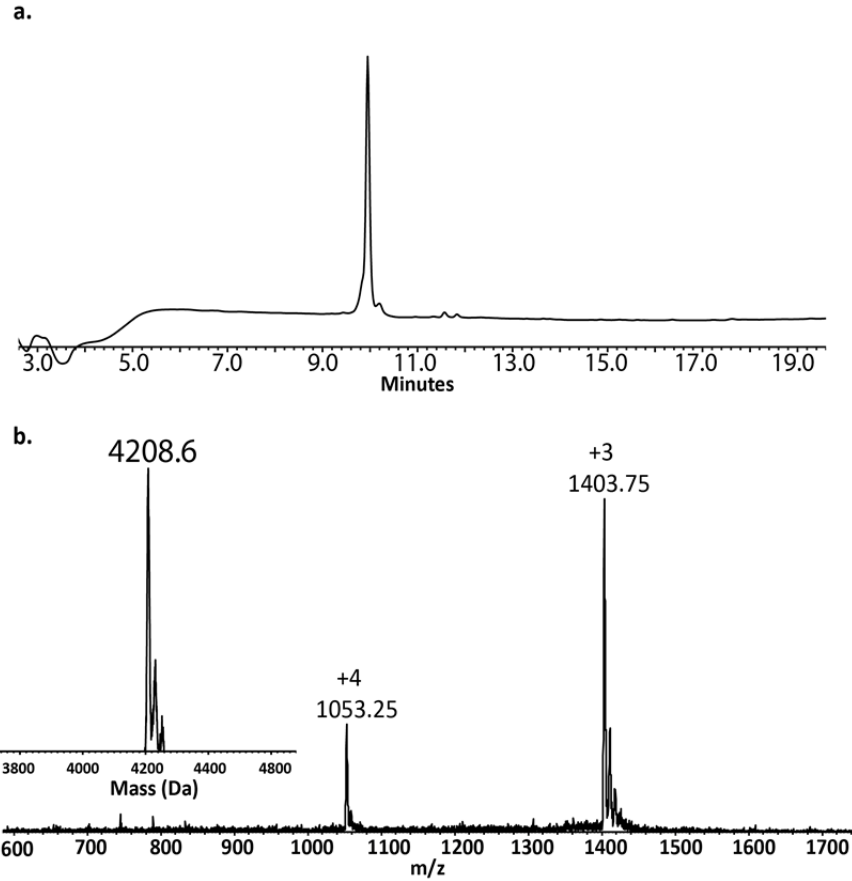

169

170 **Figure S4.** Characterization of the Hir(1-38)(C16U/C28U)-COSR segment **a.** Analytical HPLC  
 171 analysis of purified Hir(1-38)(C16U/C28U)-COSR (220 nm); **b.** The corresponding ESI-MS, with its  
 172 deconvoluted mass (inset) (obs. average  $4208.6 \pm 0.5$  Da, calc. Da 4209.3). The peptide was purified  
 173 with single diselenide crosslink and three reduced thiols.

174

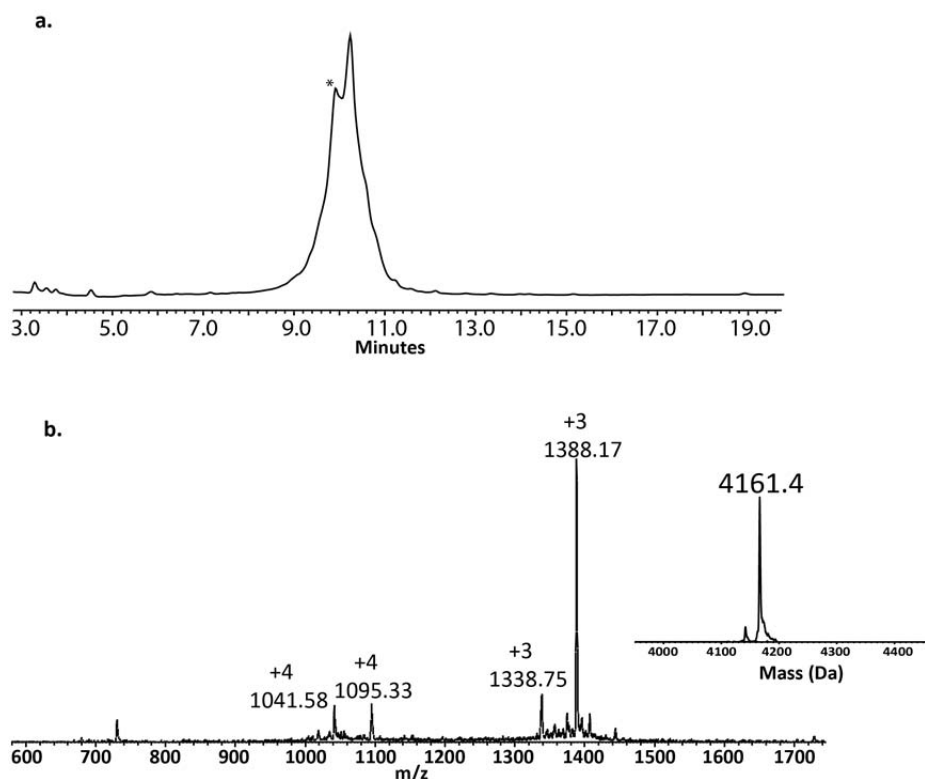

175

176 **Figure S5.** Characterization of the Hir(1-38)(C22U)-COSR segment. **a.** Analytical HPLC analysis of  
 177 purified Hir(1-38)(C22U)-COSR (220 nm); **b.** and its corresponding ESI-MS, with its deconvoluted  
 178 mass (inset) (obs. average  $4161.4 \pm 0.6$  Da, calc. Da 4162.4). \*This thioester suffered from hydrolysis  
 179 side reaction; giving Hir(1-38)(C22U)-OH (-148.1 Da). The peptide was purified with one  
 180 selenysulfide crosslink and three reduced thiols, as such, a broad peak is observed due to the formation  
 181 of a mixture selenysulfide-containing isomers, in contrast to the other peptide analogs which gave a  
 182 single isomer (sharp peak) containing a diselenide and three reduced thiols (see Fig. S3, S4 and S7 for  
 183 comparison).

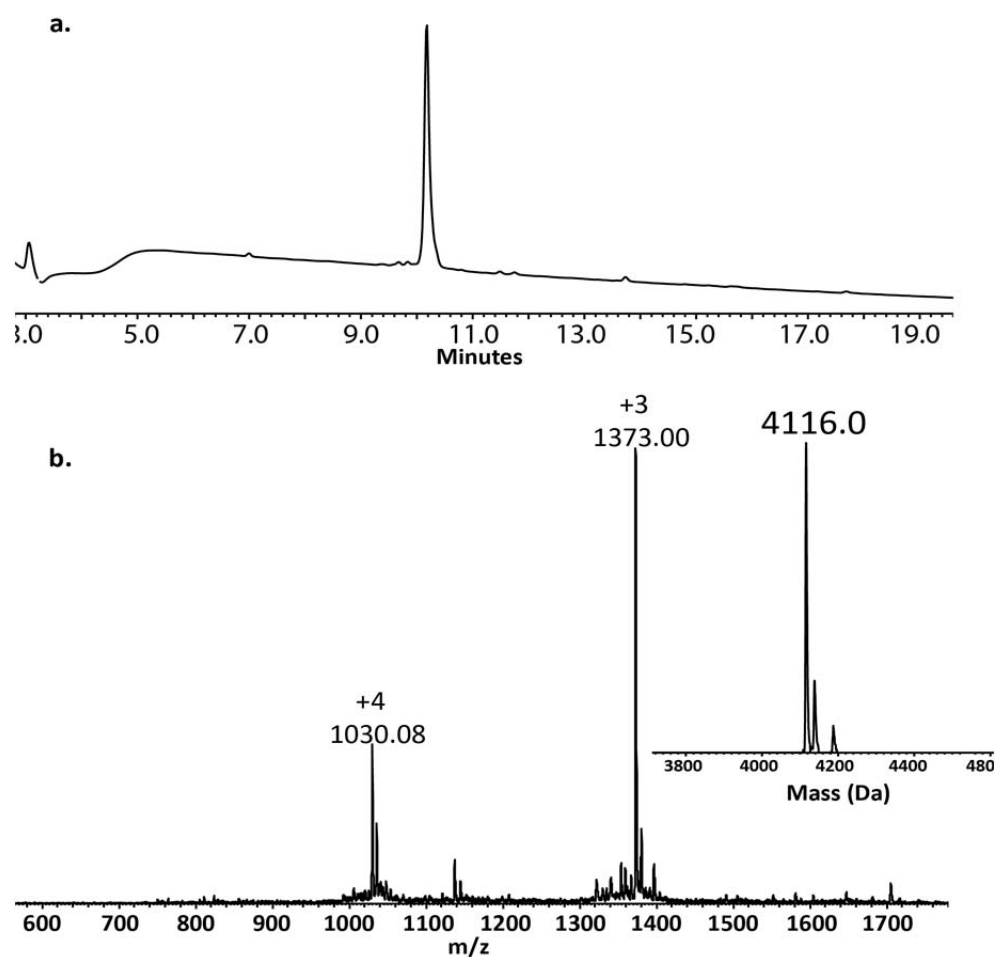

**Figure S6.** Characterization of Hir(1-38)-SR segment. **a.** Analytical HPLC analysis of purified Hir(1-38)-COSR (220 nm); **b.** The corresponding ESI-MS, with its deconvoluted mass (inset) (obs. average  $4116.0 \pm 0.2$  Da, calc. Da 4115.5). The peptide was purified with five reduced thiols.

189 **Non-native Hir(1-38)(C6U/C16U)-Nbz**

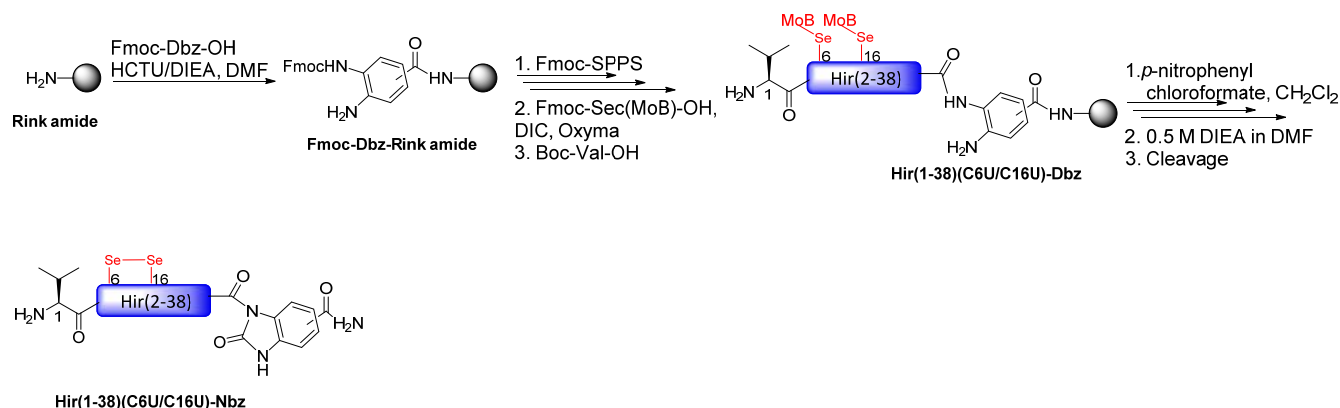

192 **Scheme S4.** Total chemical synthesis of Hir(1-38)(C6U/C16U)-Nbz by SPPS

193 The non-native diselenide-containing analog Hir(1-38)(C6U/C16U)-Nbz was synthesised on Fmoc-  
 194 Dbz-resin.<sup>[7]</sup> 0.25 mmol scale of TentaGel Ram resin (0.19 g) was used for the synthesis. Mono-Fmoc-  
 195 3,4-diaminobenzoic acid (Fmoc-Dbz-OH, 3 equiv) was activated with HCTU (3 equiv)/DIEA (6 equiv)  
 196 in DMF and coupled manually to the free amine of the resin for 2 h. The synthesis was completed on  
 197 an automated peptide synthesizer. The N-terminal amino acid was coupled manually as Boc-Val-OH (3  
 198 equiv) using HCTU (3 equiv)/DIEA (3 equiv) in DMF. Gly34 was manually coupled as (Dmb)Gly (2.5  
 199 equiv Fmoc-(Dmb)Gly-OH<sup>[2]</sup>, 2.5 equiv HCTU and 5 equiv DIEA) and Asp33 was double coupled.  
 200 Sec6 and Sec16 were manually coupled for 2 h each (3.0 equiv Fmoc-Sec(Mob)-OH activated on ice  
 201 for 5 min using 3.0 equiv OxymaPure and 2.9 equiv DIC). The cleavage was done in the presence of 2  
 202 equiv of DTNP,<sup>[5]</sup> using TFA:water:thioanisole (95:2.5:2.5) cocktail for 3-4 h.

203 On resin Nbz formation was performed by treating the peptide-Dbz-resin with a solution of *p*-  
 204 nitrophenyl chloroformate (5 equiv) in DCM and shaken for 1 h at room temperature. Following this,  
 205 the resin was washed and a solution of 0.5 M DIEA in DMF and shaken for additional 1 h to complete  
 206 Nbz formation (repeated twice). Finally, the peptide-resin was washed using DCM and dried under  
 207 vacuum.<sup>[7]</sup> The peptide was cleaved using TFA:trisopropylsilane(TIPS):water (95:2.5:2.5) for 3 h.  
 208 Purification by RP-HPLC (C18 column) yielded ~3 % of pure peptide (Scheme S4, Figure S7).

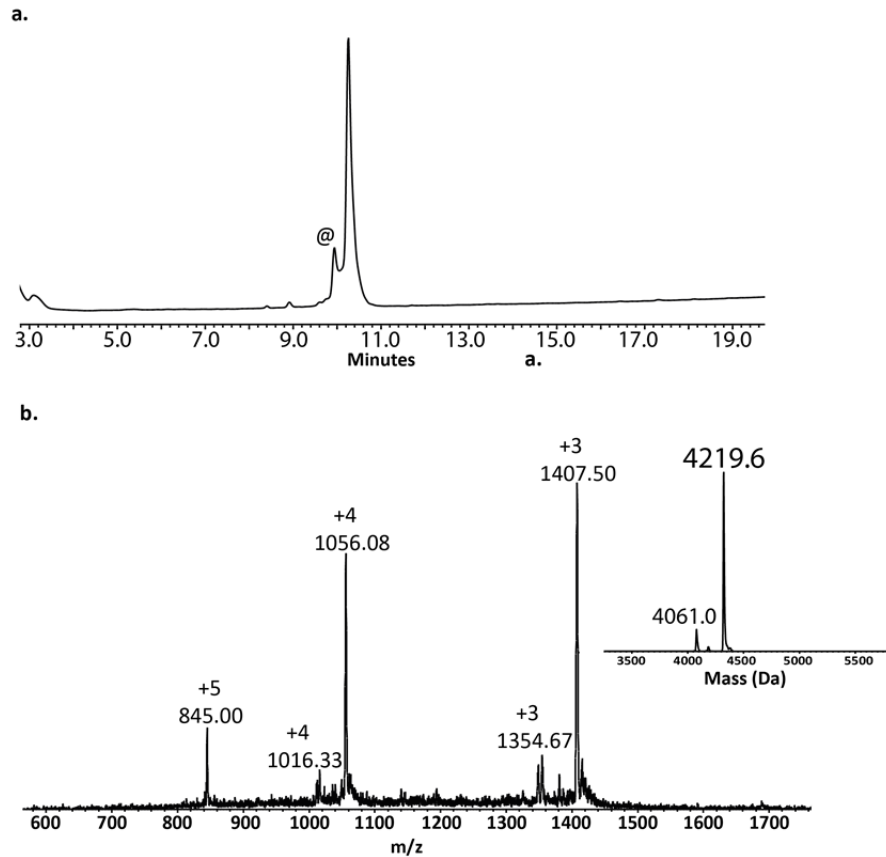

209

210 **Figure S7.** Characterization of the Hir(1-38)(C6U/C16U)-Nbz segment. **a.** Analytical HPLC analysis  
 211 of purified Hir(1-38)(C6U/C16U)-Nbz peptide (220 nm); **b.** The corresponding ESI-MS with its  
 212 deconvoluted mass (inset) (obs. average  $4219.6 \pm 0.2$  Da, calc. Da 4219.3). The peptide was purified  
 213 with single diselenide crosslink and three reduced thiols. @ hydrolysis side reaction of Hir(1-  
 214 38)(C6U/C16U)-Nbz.

215

## 4.2. Native chemical ligations (NCL)

**General Note:** It is worth noting that Sec residues are prone to oxidation, forming either selenylsulfides or diselenide bonds. Mass analyses for all Se-Hir analogues indicated the formation of a single crosslink after NCL and HPLC purification, suggesting the formation of a single diselenide bond and four free thiols.

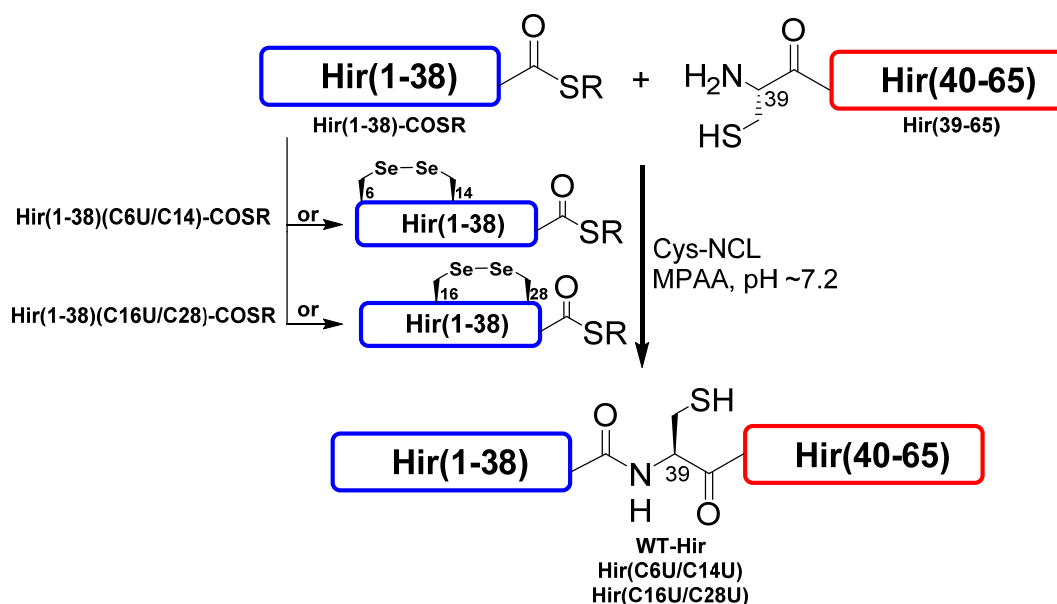

**Scheme S5.** Total chemical synthesis of WT-Hir, Hir(C6U/C14U) and Hir(C16U/C28U) by native chemical ligation (NCL)

**WT-Hir.** Hir(39-65) peptide (5.3 mg, 1.76  $\mu$ mol,  $\sim$ 3 mM) was dissolved in 0.48 mL of argon degassed buffer (200 mM PB, 6 M Gn $\cdot$ HCl, 0.2 M MPAA, pH 7.2) and this mixture was added to Hir(1-38)-COSR peptide ( $\sim$ 10 mg, 0.95  $\mu$ mol,  $\sim$ 3 mM). The reaction was followed by analytical HPLC (C4 column), and completed in 18 h. The product was purified by semi-prep (C4 column) to afford  $\sim$ 52% ( $\sim$ 8 mg) of pure protein (Scheme S5, Figure S8).

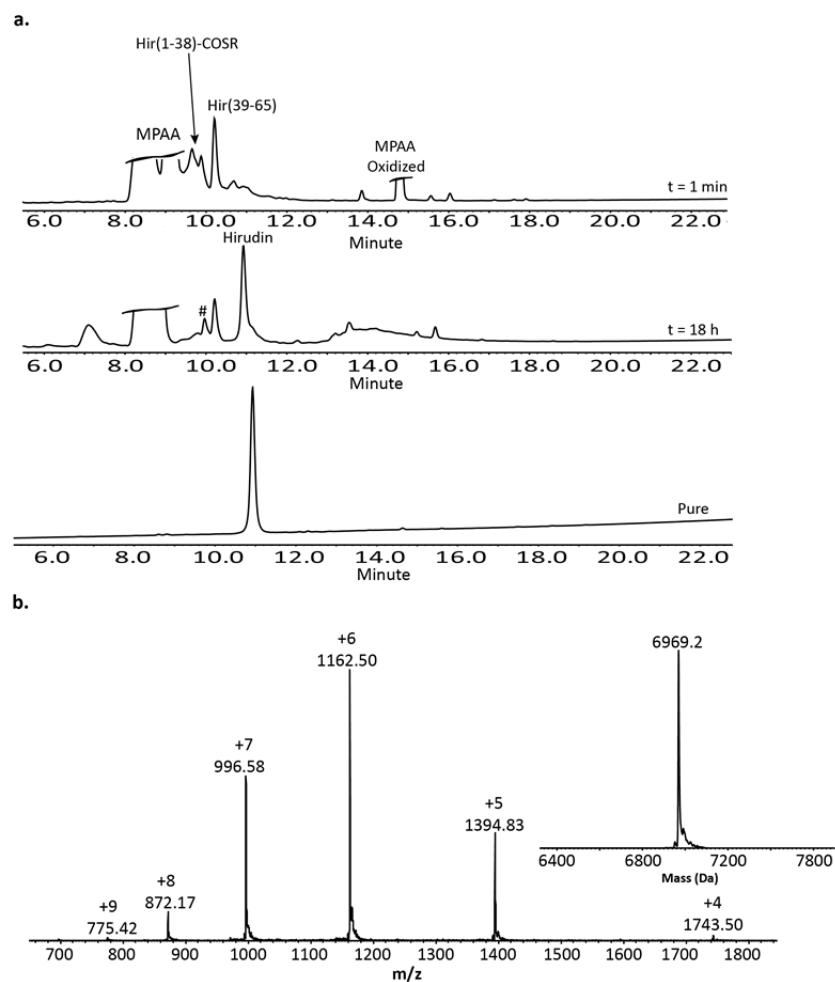

**Figure S8.** Preparation of WT-Hir. **a.** Analytical HPLC of Cys-NCL reaction (220 nm). The ligated product purified by semi-prep HPLC. **b.** The corresponding ESI-MS with four reduced thiols (obs. average  $6969.2 \pm 0.5$  Da, calc. 6969.5 Da). # hydrolysis side reaction of Hir(1-38)-COSR.

**Hir(C6U/C14U).** Hir(39-65) peptide (6 mg, 1.99  $\mu$ mol,  $\sim 3$  mM) was dissolved in 0.66 mL of argon degassed buffer (200 mM PB, 6 M Gn $\cdot$ HCl, 0.2 M MPAA, pH 7.2) and this mixture was added to Hir(1-38)(C6U/C14U)-COSR peptide ( $\sim 7$  mg, 1.66  $\mu$ mol,  $\sim 3$  mM). The reaction was followed by analytical HPLC (C4 column), and completed in 18 h. The product was purified by semi-prep (C4 column) to afford  $\sim 45\%$  ( $\sim 5.8$  mg) of pure protein (Scheme S5, Figure S9).

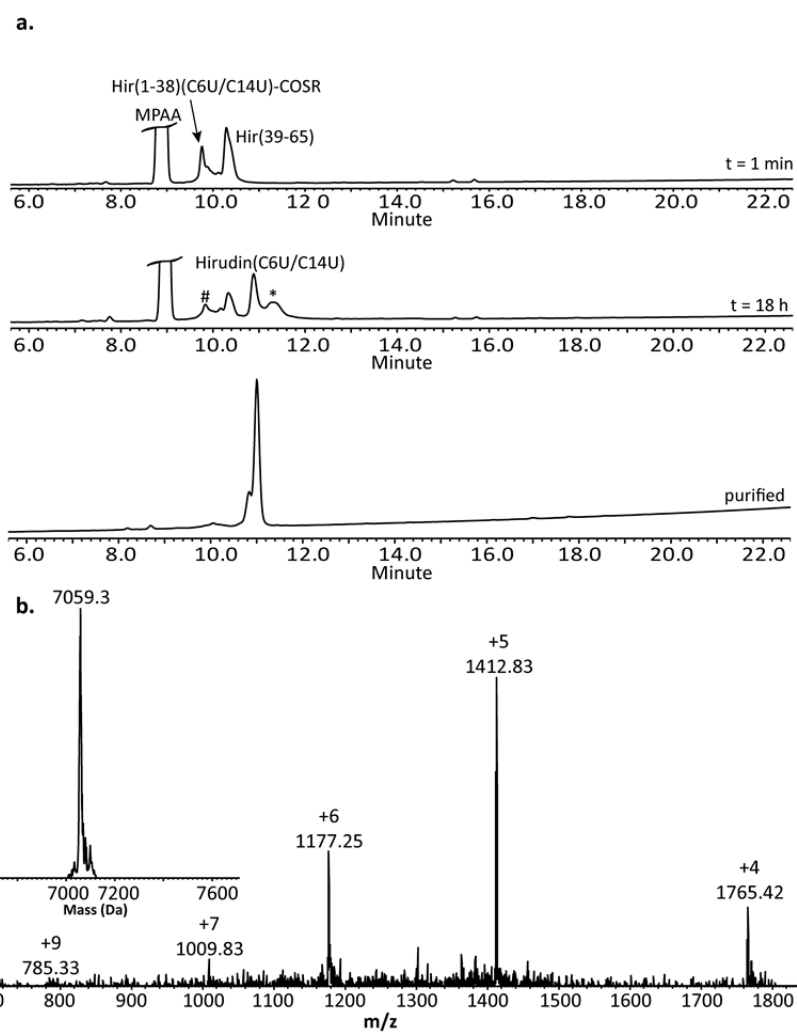

**Figure S9.** Preparation of Hir(C6U/C14U). **a.** Analytical HPLC of Cys-NCL reaction (220 nm). The ligated product purified by semi-prep HPLC. **b.** The corresponding ESI-MS of Hir(C6U/C14U) oxidized with a diselenide at position 6–14 and four reduced thiols. (obs. average  $7061.0 \pm 1.8$  Da, calc. 7061.2 Da). # hydrolysis side reaction of Hir(1-38)(C6U/C14U)-COSR.

250 **Hir(C16U/C28U).** Hir(28-65) peptide (7 mg, 2.35  $\mu\text{mol}$ ,  $\sim 3$  mM) was dissolved in 0.78 mL of argon  
 251 degassed buffer (200 mM PB, 6 M Gn $\cdot$ HCl, 0.2 M MPAA, pH 7.2) and this mixture was added to  
 252 Hir(1-38)(C16U/C28U)-COSR peptide ( $\sim 9$  mg, 2.14  $\mu\text{mol}$ ,  $\sim 3$  mM). The reaction was followed by  
 253 analytical HPLC (C4 column), and completed in 18 h. The product was purified by semi-prep (C4  
 254 column) to afford  $\sim 47\%$  ( $\sim 7.5$  mg) of pure protein (Scheme S5, Figure S10).

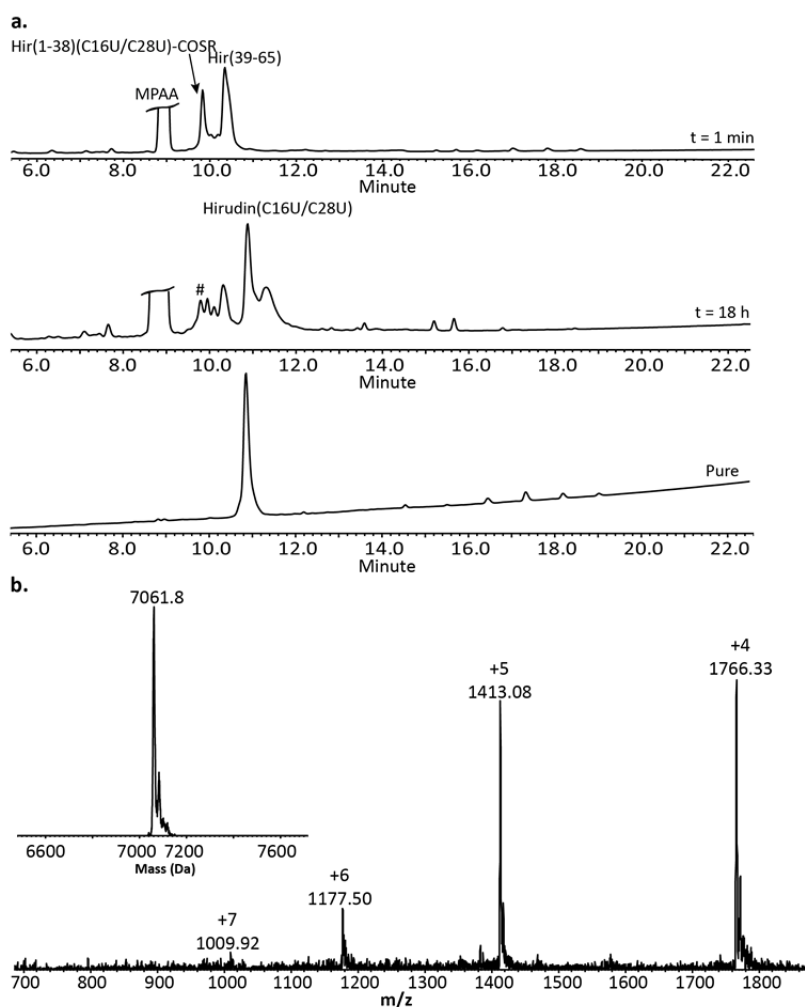

255

256 **Figure S10.** Preparation of Hirudin(C16U/C28U). **a.** Analytical HPLC of Cys-NCL reaction (220 nm).  
 257 The ligated product purified by semi-prep HPLC; **b.** ESI-MS of Hirudin(C16U/C28U) oxidized with  
 258 diselenide bond and four reduced thiols. (obs. average  $7061.8 \pm 1.4$  Da, calc. 7061.2 Da). # hydrolysis  
 259 side reaction of Hir(1-38)(C16U/C28U)-COSR.

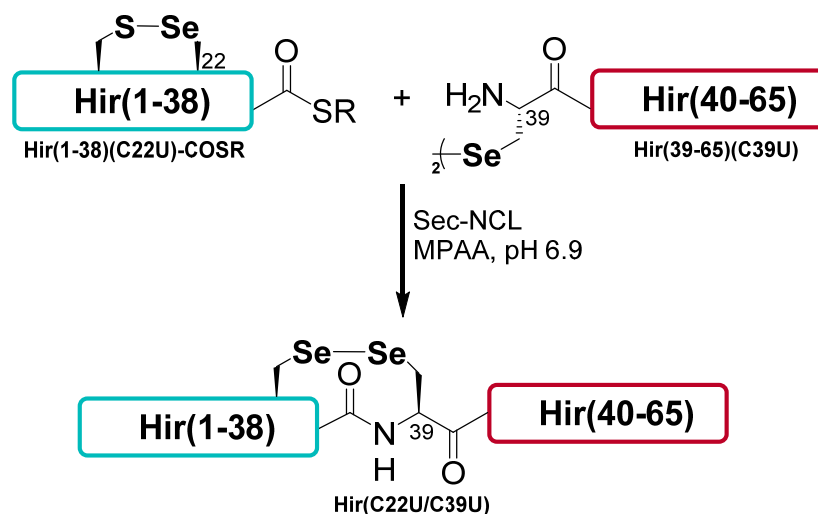

261

**Hir(C22U/C39U).** Hir(39-65)(C39U) peptide (3.7 mg, 1.2  $\mu$ mol,  $\sim$ 3 mM) was dissolved in 0.4 mL of argon degassed buffer (200 mM PB, 6 M Gn $\cdot$ HCl, 0.2 M MPAA, pH 6.9) and this mixture was added to Hir(1-38)(C22U)-COSR peptide ( $\sim$ 5 mg, 1.2  $\mu$ mol,  $\sim$ 3 mM). The reaction was followed by analytical HPLC (C4 column), and completed in 18 h. The product was purified by semi-prep (C4 column) to afford  $\sim$ 17% ( $\sim$ 1.5 mg) of pure protein (Scheme S6, Figure S11).

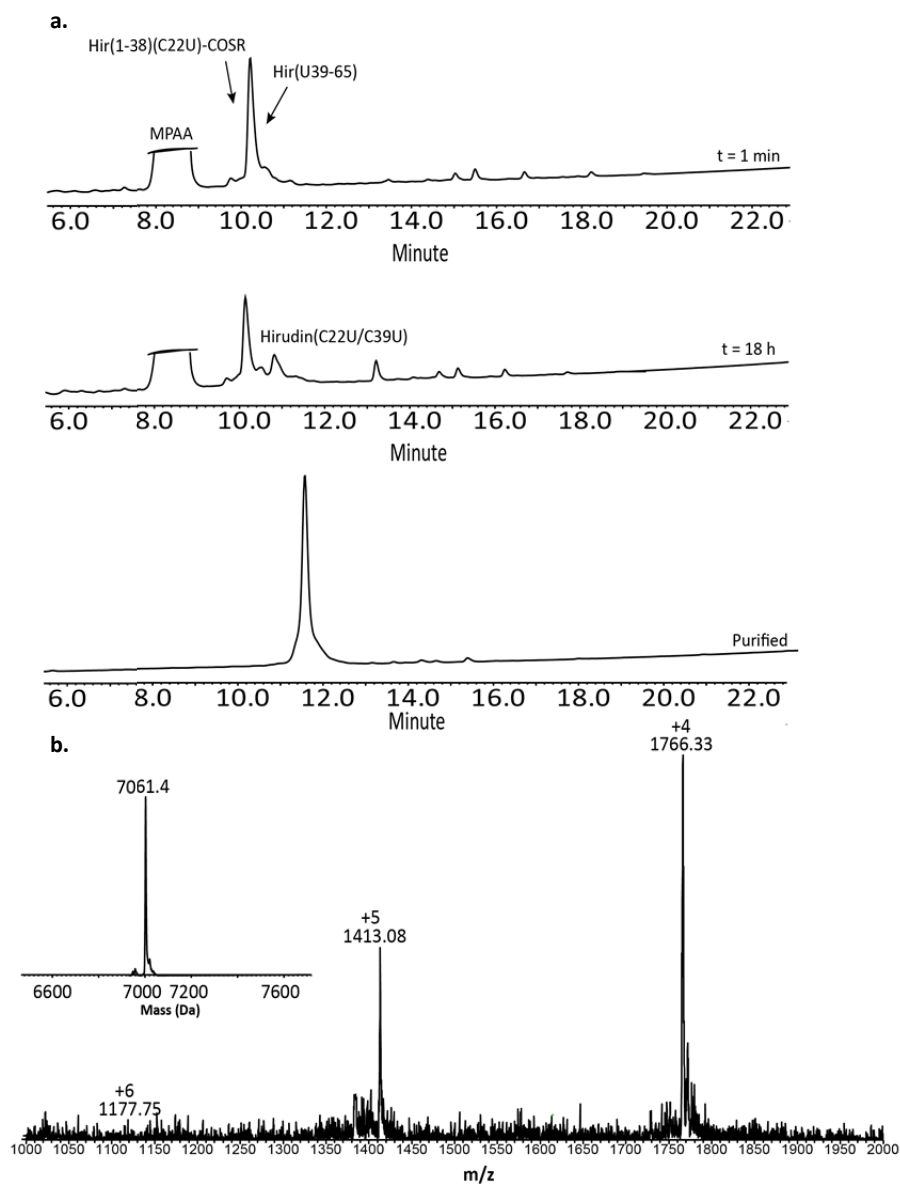

**Figure S11.** Preparation of Hir(C22U/C39U). **a.** Analytical HPLC of Sec-NCL reaction (220 nm). The ligated product purified by semi-prep HPLC. **b.** The corresponding ESI-MS of Hir(C22U/C39U) oxidized with diselenide bond and four reduced thiols. (obs. average  $7061.4 \pm 1.4$  Da, calc. 7061.2 Da).

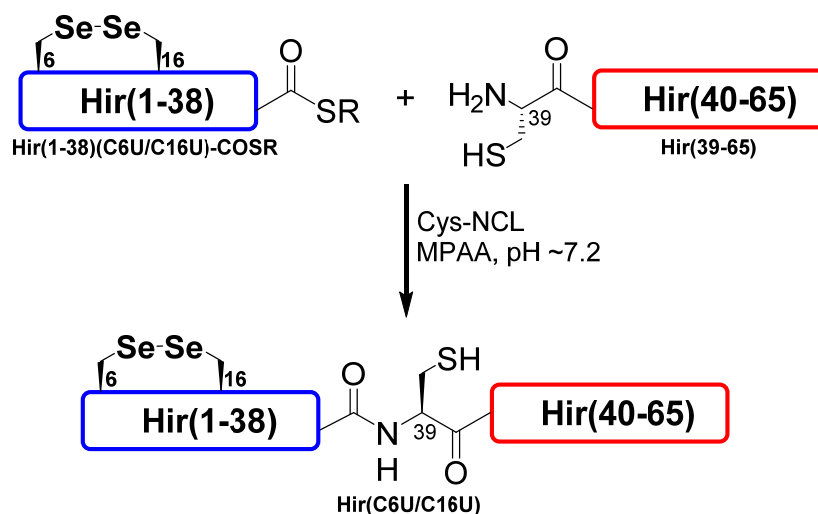

**Scheme S7.** Total chemical synthesis of, Hir(C6U/C16U) by NCL

**Hir(C6U/C16U).** The Hir(39-65) peptide (4.3 mg, 1.43  $\mu\text{mol}$ ,  $\sim 3$  mM) was dissolved in 0.48 mL of argon degassed buffer (200 mM PB, 6 M  $\text{Gn}\cdot\text{HCl}$ , 0.2 M MPAA, pH 7.2) and this mixture was added to Hir(1-38)(C6U/C16U)-Nbz peptide ( $\sim 4$  mg, 0.95  $\mu\text{mol}$ ,  $\sim 3$  mM). The reaction was followed by analytical HPLC (C4 column), and completed in 10 h. The product was purified by semi-prep (C8 column) to afford  $\sim 37\%$  ( $\sim 3$  mg) of pure peptide (Scheme S7, Figure S12).

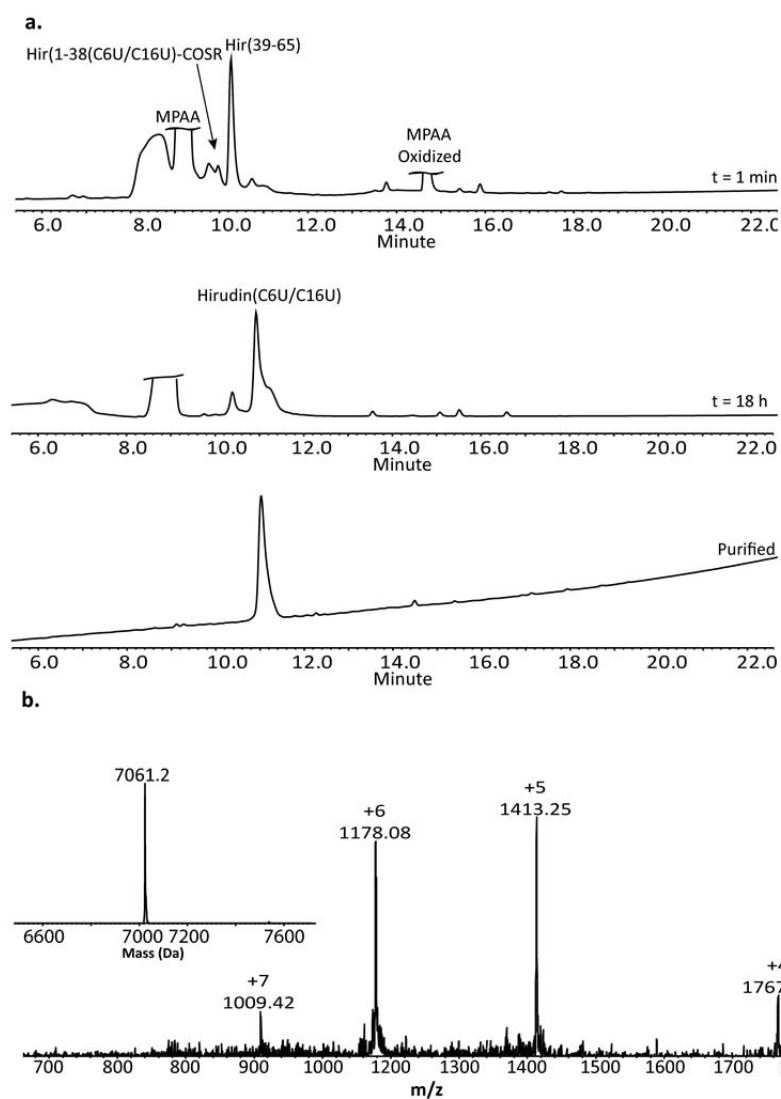

**Figure S12.** Preparation of Hir(C6U/C16U). a. Analytical HPLC of Cys-NCL reaction (220 nm). The ligated product purified by semi-prep HPLC. b. The corresponding ESI-MS of Hir(C6U/C16U) oxidized with diselenide bond and four reduced thiols. (obs. average  $7061.2 \pm 0.7$  Da, calc. 7061.2 Da).

### 287 4.3. Oxidative folding

288 The oxidative folding experiments were performed according to the reported study by Chang *et al*, to  
289 allow for a direct comparison.<sup>[8]</sup> All folding reactions were performed under anaerobic conditions  
290 (except if stated otherwise) in an anaerobic chamber (Coy Laboratories Inc., O<sub>2</sub> sensor kept at <5 ppm)  
291 with nitrogen and hydrogen atmosphere (95%:5%) in degassed Tris·HCl buffer (100 mM Tris·HCl, 200  
292 mM NaCl, 1mM EDTA, pH 8.7). Oxidized glutathione (GSSG, 5 equiv, final concentration 150 μM  
293 was added to 30 μM of reduced WT-Hir and its seleno-analogs. At various time intervals, 80 μL  
294 aliquots were removed and quenched with 30 μL of 2 M HCl, and stored at -20°C before analysis by  
295 analytical HPLC. The reaction mixture was injected into Atlantis T3 column (3 μm, 4.6 × 150 mm  
296 heated to 40 °C) and eluted from the column by 15:85 to 22:78 gradient over 15 min (B:A), and  
297 increasing to 28:72 over 32 min, and reaching the initial conditions over 36 min. All chromatograms  
298 were monitored at a wavelength of 220 nm (Fig. 2 in the main text).

299 The same experiment was repeated under aerobic conditions and in the absence of GSSG with WT-Hir  
300 and Hir(C16U/C28U) (Fig. S13 and Fig. 3a in the main text), in which oxygen is the only oxidant in  
301 solution. The folding was much slower compared to anaerobic conditions and in the presence of GSSG.

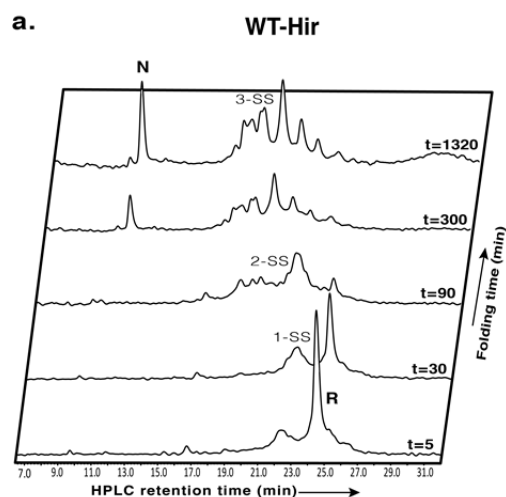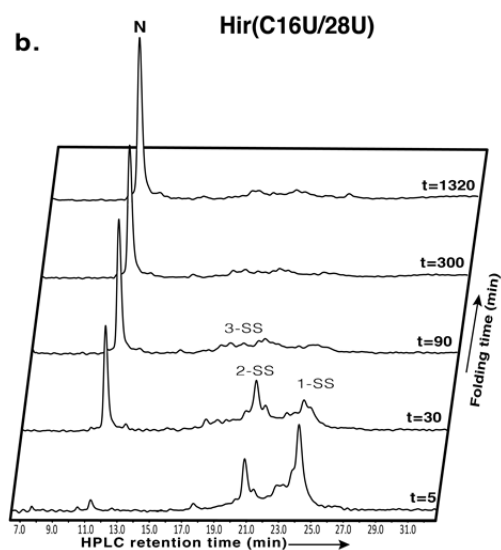

**Figure S13.** The aerobic oxidative folding at pH 8.7 and in the absence of GSSG for 30  $\mu$ M of (a) WT-Hir and (b) Hir(C16U/C28U). 1-SS, 2-SS and 3-SS represents the number of disulfide (or diselenide) crosslinks in the intermediates.

#### 311 4.4. X-Ray crystallography: Crystallization, data collection and structural analysis

312

313 The lyophilized Se-hirudin (Se-Hir) protein analogs were dissolved in water to a final concentration of  
314 10 mg/mL. Thrombin from bovine plasma (Sigma-Aldrich) was dissolved in a solution containing 0.08  
315 M sodium phosphate buffer (pH 7.5), 0.5 M NaCl and 0.1% PEG 6000 to prepare an 8 mg/mL protein  
316 solution. The three Se-Hir analogs, Hir(C16U/C28U); Hir(C6U/C14U); Hir(C22U/C39U), prepared in  
317 this way were then mixed with the thrombin solution (in molar ratio of 1:1.3 for Thrombin/Se-Hir  
318 analog) to obtain the three Se-Hir-Thrombin complexes submitted for crystallization.

319

##### 320 4.4.1. The Hir(C16U/C28U)-Thrombin complex (Complex-1)

321 Crystals of the Hir(C16U/C28U)-Thrombin complex were obtained in about one day by the hanging-  
322 drop vapor diffusion method. Crystallization drops contained 1  $\mu$ L complex and 1  $\mu$ L reservoir solution,  
323 equilibrated over 500  $\mu$ L of reservoir solution, containing 38% PEG 4000, 0.1 M sodium phosphate  
324 (pH 4.7), and 0.2 M NaCl. Streak seeding was performed using 1/100 micro-seed stock solution. The  
325 crystals were prepared for data collection by flash freezing in liquid nitrogen directly, without any  
326 additional cryogenic solution. X-ray diffraction data were collected at the Se-peak wavelength ( $\lambda$ =  
327 0.97864 Å) using the P13 beamline of the DESY synchrotron facility (Hamburg, Germany), indicating  
328 that these crystals belong to the  $C222_1$  space group. The datasets were processed and integrated using  
329 the *DIALS* software package,<sup>[9]</sup> reduced (scaled and merged) by *Aimless*<sup>[10]</sup> (provided within the  
330 *CCP4i2*-graphical user interface of the *CCP4* software suit)<sup>[11]</sup> to a final resolution of 1.6Å. Molecular  
331 replacement structure determination was performed by *Phenix.phaser*<sup>[12]</sup>, using the PDB-deposited  
332 structure of WT-Hir-thrombin (bovine) complex (PDB ID: 1HRT<sup>[13]</sup>) as a search model. The initial  
333 structure was adjusted and improved by manual building with *Coot*<sup>[14]</sup> and refined using *Refmac5*<sup>[15]</sup>  
334 (within the *CCP4i2*-graphical user interface)<sup>[11]</sup>, resulting in a final  $R_{work}$  of 0.182 and  $R_{free}$  of 0.216  
335 (Table S1).

336

337

338

#### 4.4.2. The Hir(C6U/C14U)-Thrombin complex (Complex-2)

Crystals of the Hir(C6U/C14U)-Thrombin complex were obtained roughly by the same procedure described for Complex-1 above within 1-2 days of equilibration. X-ray diffraction data were collected remotely at the Se-peak wavelength ( $\lambda = 0.9763$  Å) using the I04 beamline of the Diamond light source (London, UK), as a part of a CCP4/BGU workshop on "Advanced methods for macromolecular structure determination". The dataset, confirming that these crystals also belong to the  $C222_1$  space group, were automatically processed using *Xia2-Dials* at the beamline working station, to a final resolution of 1.9 Å. Molecular replacement was performed by *Phaser* (CCP4i2-graphical user interface of CCP4 program suit)<sup>[11]</sup> using the structure of Complex-1 as a search model. The initial structure was adjusted and improved by manual building with *Coot*<sup>[14]</sup> and refined by *Refmac5*<sup>[15]</sup>, resulting in a final  $R_{work}$  of 0.214 and  $R_{free}$  of 0.263 (Table S1).

#### 4.4.3. The Hir(C22U/C39U)-Thrombin complex (Complex-3)

Crystals of Hir(C22U/C39U)-Thrombin complex were obtained by a similar procedure to that described above for Complex-1 and Complex-2, except that the crystallization condition contained 0.3 M NaCl and the streaked seeding was performed with 1/10 micro-seeds solution. X-ray diffraction data were collected at the Se-peak wavelength ( $\lambda = 0.97864$  Å) using the P11 beamline of the DESY synchrotron facility (Hamburg, Germany). The dataset, confirming again that these crystals belong to the  $C222_1$  space group, were automatically processed using the *XDS* software package<sup>[16]</sup>, reduced and merged by *Aimless*<sup>[10]</sup> to a final resolution of 2.7 Å. A molecular replacement was performed by *Phaser* (CCP4i2-graphical user interface of CCP4 program suit)<sup>[11]</sup> using the structure of Complex-1 as a search model. The initial structure obtained was further improved by manual building with *Coot*<sup>[14]</sup> and refined by *Refmac5* using restrained refinement<sup>[15]</sup>, resulting in a final  $R_{work}$  of 0.194 and  $R_{free}$  of 0.253. Geometric validation for the three final structures of Complexes 1-3 were performed by *Molprobit*<sup>[17]</sup> and using the validation tools provided in *Coot*<sup>5</sup>. Data collection and refinement statistics for the three structures are summarized in **Table S1**.

**Table S1.** Crystallographic data collection and refinement parameters for the three Se-Hir-Thrombin complexes (Complex-1, Complex-2, Complex-3)

\* data in parentheses refer to the last resolution shell

\*\* No. of reflections used to calculate  $R_{free}$  (about 5% of the total)

|                               | <b>Hir(C16U/C28U)-<br/>Thrombin</b> | <b>Hir(C6U/C14U)-<br/>Thrombin</b> | <b>Hir(C22U/C39U)-<br/>Thrombin</b> |
|-------------------------------|-------------------------------------|------------------------------------|-------------------------------------|
| <u>Data Collection</u>        |                                     |                                    |                                     |
| X-ray source                  | P13-DESY                            | I04-Diamond                        | P11-DESY                            |
| Wavelength (Å)                | 0.9786                              | 0.9763                             | 0.9778                              |
| Space group                   | <i>C222<sub>1</sub></i>             | <i>C222<sub>1</sub></i>            | <i>C222<sub>1</sub></i>             |
| <u>Cell dimensions</u>        |                                     |                                    |                                     |
| a, b, c (Å)                   | 58.67, 102.37, 142.74               | 58.10, 101.99, 144.04              | 58.07, 101.50, 142.07               |
| $\alpha, \beta, \gamma$ (°)   | 90, 90, 90                          | 90, 90, 90                         | 90, 90, 90                          |
| Resolution (Å) *              | 48.18-1.60 (1.66-1.60)              | 72.02-1.90 (1.93-1.90)             | 47.79-2.70 (2.83-2.70)              |
| $R_{merge}$                   | 0.096 (2.37)                        | 0.206 (1.848)                      | 0.287 (1.80)                        |
| $R_{pim}$                     | 0.028 (0.693)                       | 0.062 (1.061)                      | 0.082 (0.514)                       |
| $R_{meas}$                    | 0.1 (2.470)                         | 0.216 (2.148)                      | 0.299 (1.873)                       |
| $\langle I/\sigma(I) \rangle$ | 13.8 (1.1)                          | 5.0 (0.2)                          | 8.9 (1.6)                           |
| Completeness (%)              | 99.9 (98.3)                         | 98.1 (78.8)                        | 100 (99.9)                          |
| Redundancy                    | 13.0 (12.5)                         | 10.6 (4.09)                        | 13.1 (13.1)                         |
| CC <sub>1/2</sub>             | 0.999 (0.421)                       | 0.992 (0.873)                      | 0.992 (0.592)                       |
| <u>Refinement</u>             |                                     |                                    |                                     |
| Resolution (Å)                | 48.23-1.60                          | 72.13-1.90                         | 47.84-2.70                          |
| No. of reflections            |                                     |                                    |                                     |
| all                           | 56953                               | 33424                              | 11902                               |
| for $R_{free}$ **             | 2797                                | 1572                               | 586                                 |
| $R_{work} / R_{free}$         | 0.182/ 0.216                        | 0.214/0.263                        | 0.194/0.253                         |
| No. of atoms                  |                                     |                                    |                                     |
| Protein                       | 2809                                | 2850                               | 2836                                |

|                                   |            |             |            |            |
|-----------------------------------|------------|-------------|------------|------------|
| Ligand/ion                        | 40/1       | 26/1        | 26/1       | 369        |
| Water                             | 357        | 215         | 73         | 370        |
| B-factors<br><B <sub>fact</sub> > |            |             |            | 371<br>372 |
| Protein                           | 31.61      | 40.92       | 45.45      | 373        |
| Ligand/ion                        | 77.01/42.8 | 55.93/29.67 | 61.99/28.2 | 374        |
| Water                             | 42.8       | 43.29       | 36.41      | 375        |
| R.M.S.D.                          |            |             |            | 376        |
| Bond length (Å)                   | 0.0114     | 0.0061      | 0.0100     | 377        |
| Bond angles (°)                   | 1.875      | 1.453       | 1.744      | 378        |
| PDB code                          | 7A0D       | 7A0E        | 7A0F       | 379        |

380

381

382

383

384

385

#### 386 4.4.4. Supplementary discussion- Further structural analysis

##### 387 4.4.4.1. The overall structures

388 As described in the main text, three of the disulfide bonds of WT-Hir have been replaced with  
389 diselenide bonds (at crosslinks 16–28, 6–14, and 22–39), one in each of the three Se-Hir analogs  
390 discussed here. The three Se-Hir derivatives were then mixed with their target thrombin protease (from  
391 a bovine source) to form tight and stable Se-Hir-Thrombin complexes; the Hir(C16U/C28U)-Thrombin  
392 complex (Complex-1), the Hir(C6U/C14U)-Thrombin complex (Complex-2), and the  
393 Hir(C22U/C39U)-Thrombin complex (Complex 3). These complexes were subjected to comprehensive  
394 structural analysis by X-ray crystallography, to dissect any differences observed between the three Se-  
395 Hir analogs. These final 3D structures are presented in the main manuscript (**Figure 4**), and the  
396 corresponding structural determination parameters are listed in **Table S1**. As demonstrated in this table,  
397 although the three complexes were determined at different resolutions, their final crystallographic  
398 structural parameters are quite good, confirming that these structures are sufficiently reliable for  
399 detailed analyses and comparisons, as further discussed below. In this respect, it is noted that several  
400 side chains have not been modeled in the final structures of the three Se-Hir-Thrombin complexes  
401 presented here, mainly due to ambiguous electron density, perhaps originating from the local flexibility  
402 of these side chains. This is specifically the case with the thrombin side chains of tLeu64 (chain I),  
403 tTyr71 (chain H) and tGlu72 (chain H) in Complex-1, and the side chain of hGln65 (chain I) in both  
404 Complex-1 and Complex-2. These side chains are therefore not included in the structural analysis and  
405 comparisons discussed below. In order to keep the structural analysis clear and simple, we used a prefix  
406 of "t" and "h" to refer to residues of the thrombin and hirudin, respectively. Yet, to remain consistent  
407 with previous reports related to thrombin/hirudin structures, we also kept in some places in the text and  
408 the tables the postfix labeling of the commonly used PDB chains, using "L" for the light chain of  
409 thrombin, "H" for the heavy chain of thrombin, and "I" for the entire chain of the hirudin inhibitor.  
410 These postfix labels of L, H, and I were also used in the deposited PDB coordinates of the current  
411 structures.

412 In general, all three structures are quite similar to each other, and to the reported 3D structure of WT-  
413 Hir in complex with bovine thrombin (PDB ID: 1HRT).<sup>[13]</sup> A global structural comparison of the bound  
414 Se-Hir in Complex-1-3, to the bound WT-Hir in this reference structure (PDB ID: 1HRT) gives  
415 relatively small (overall) RMSD values of 1.620, 1.476, 1.472 Å, respectively. These values, as well as  
416 a visual superposition of each of these pairs (**Figure S14**) indeed confirm that no major global

417 structural differences could be observed between the four structures compared, confirming that native  
418 folded states have been reached with all the protein analogs studied here. This led us to examine more  
419 carefully the local conformations at specific segments of the bound Se-Hir analog in these structures, in  
420 an attempt to identify some local structural changes, especially around the modified  
421 disulfide/diselenide bonds. These detailed local comparisons are further described below.

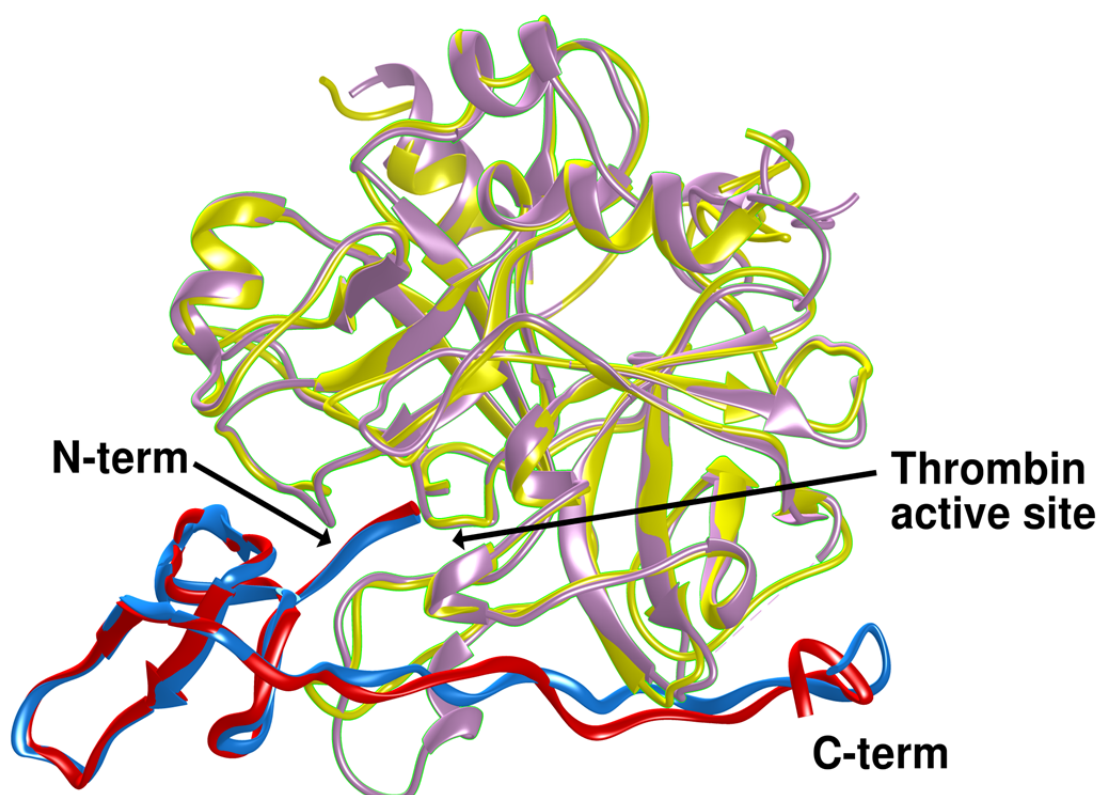

422

423 **Figure S14.** A superposition of the structure of Complex-1 with the corresponding reported structure of  
424 WT-Hir-Thrombin (PDB ID: 1HRT). Color codes: **Complex-1** - Thrombin heavy and light chains  
425 (*plum*); Hir(C16U/C28U) (*blue*, PDB ID: 7A0D). **PDB ID:1HRT** - Thrombin heavy and light chains  
426 (*yellow*); WT-Hir (*red*). The hirudin N-terminus and C-terminus are marked for both complexes.

#### 427 4.4.4.2. The diselenide bonds and their environments

428 The Se-Se bond length in the three derivatives and the dihedral angles around them are listed (**Table**  
429 **S2**) and graphically presented (**Figure S15**), compared to the corresponding disulfide bonds in WT-Hir  
430 in the published WT-Hir-Thrombin structure (PDB ID: 1HRT).<sup>[13]</sup>

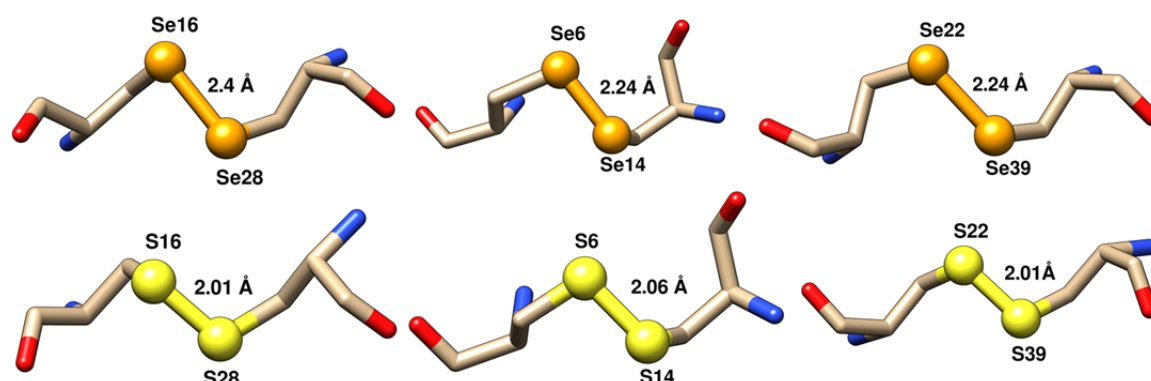

**Figure S15.** Comparison of the Se-Se bonds in the Se-Hir analogs analyzed here and the corresponding S-S bonds in the published structure of WT-Hir.

As expected, the diselenide bonds are longer than the corresponding disulfide bonds, in correlation to the larger atomic VDW cross-section of the interacting atoms. Interestingly, the diselenide bond in Hir(C16U/C28U) was found to be significantly longer compared to the other two diselenide bonds, yet still within the observed range of diselenide bond lengths. Surprisingly, however, the local environments of the three diselenide bonds are not considerably different from those of the corresponding disulfide bonds in the reported WT-Hir-thrombin complex. This is also the case with the unchanged disulfide bonds in the three current Se-Hir analogs.

**Table S2.** Dihedral angles around the three replaced Se-Se bonds in the current Se-Hir-Thrombin complexes, compared to the corresponding angles in the WT-Hir-Thrombin complex (PDB ID:1HRT).

|                           | <i>Hir(C16U/C28U)-Thrombin</i> |                 | <i>Hir(C6U/C14U)-Thrombin</i> |                 | <i>Hir(C22U/C39U)-Thrombin</i> |                 |
|---------------------------|--------------------------------|-----------------|-------------------------------|-----------------|--------------------------------|-----------------|
|                           | /<br><i>PDB ID:1HRT</i>        |                 | /<br><i>1HRT</i>              |                 | /<br><i>1HRT</i>               |                 |
| Dihedral<br>angles (°)    | <i>Se16-Se28 / S16-S28</i>     |                 | <i>Se6-Se14 / S6-S14</i>      |                 | <i>Se22-Se39 / S22-S39</i>     |                 |
|                           | <i>Se16/S16</i>                | <i>Se28/S28</i> | <i>Se6/S6</i>                 | <i>Se14/S14</i> | <i>Se22/S22</i>                | <i>Se39/S39</i> |
| <i>Phi</i> ( $\varphi$ )  | -117/-91                       | -95 /-82        | -55/-72                       | -157/-132       | -79/-106                       | -79/-80         |
| <i>Psi</i> ( $\psi$ )     | -72 /-68                       | 126/115         | 137/123                       | 165/172         | 122/109                        | 118/99          |
| <i>Omega</i> ( $\omega$ ) | 178. /-179                     | 169/177.53      | -175/178                      | -178/178        | -172/-178                      | 179/179         |
| <i>Chi</i> ( $\chi$ )     | 179/-170                       | -173/-167       | -52/-53                       | 48/59           | -153/-179                      | -160/164        |

#### 4.4.4.3. Intramolecular hydrogen bonds within the Se-Hir structures

We next examined the *intramolecular* hydrogen bonds within the Se-Hir structures, focusing mainly on identifying differences that would explain the disparate characteristics observed for the Hir(C6U/C14U) analog (in Complex-2), compared with WT-Hir, as well as to the other two Se-Hir derivatives. As noted in the past,<sup>[13]</sup> the hirudin protein contains a very stable core domain, built of residues 5-48, and contain three conserved disulfide bonds, from which two peptides are emanating away, a short peptide at the N-terminus (residues 1-4) and a longer peptide at the C-terminus (residues 49-65). The current structures of the three Se-Hir analogs demonstrate that the core domain of the protein remains practically unchanged, and is tightly held in its original conformation by a conserved network of intramolecular hydrogen bonds (**Figure S16**). These interactions are summarized in Table S3, together with a comparison to the corresponding interactions in the WT-Hir complex (PDB ID: 1HRT). In these analyses we use a relatively generous cutoff criterion for the distance (3.6Å) between the potential donors and acceptors of the hydrogen bonding interactions, in order to include as many interactions as possible. The presence of a potential hydrogen bond, and the relevant donor-acceptor distance, were determined using the commonly used routines in the *Chimera* software.<sup>9</sup> Using such analyses, we observed only relatively small differences in the hydrogen bond interactions amongst the four compared structures, and generally these differences do not seem to identify significant changes in molecular characteristics.

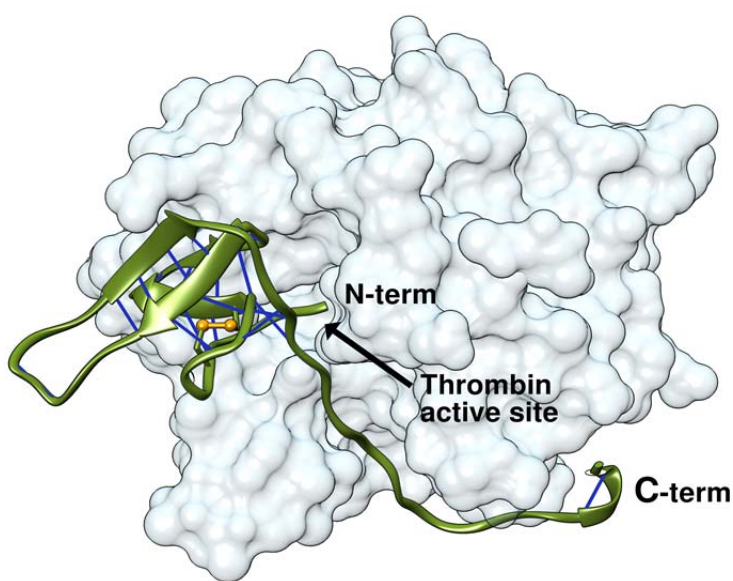

**Figure S16.** Hir(C6U/C14U) (*green*) as it appears in its tight complex with thrombin (Complex-2, PDB ID: 7A0E), demonstrating the tight binding of hirudin onto the specific grooves of thrombin. The Se-

466 Se bond is shown in *gold*, and the comprehensive network of intramolecular H-bonds (within hirudin)  
 467 is shown in *blue*, accounting for the relatively rigid conformation of the core domain of this protein.

468 **Table S3.** Intramolecular hydrogen-bonding interactions within the current structures of the Se-Hir  
 469 analogues as compared to the published structure of WT-Hir (PDB ID: 1HRT).

| <i>Hydrogen bonds/ amino acids</i> |                 | <i>Hir(C16U/C28U)</i>               | <i>Hir(C6U/C14U)</i>                | <i>Hir(C22U/C39U)</i>               | <i>WT-Hir</i>                       |
|------------------------------------|-----------------|-------------------------------------|-------------------------------------|-------------------------------------|-------------------------------------|
| <i>Donor</i>                       | <i>Acceptor</i> | <i>Distance (Å)</i><br><i>D...A</i> | <i>Distance (Å)</i><br><i>D...A</i> | <i>Distance (Å)</i><br><i>D...A</i> | <i>Distance (Å)</i><br><i>D...A</i> |
| Cys6.I N                           | Leu15.I O       | 2.966                               | -----                               | -----                               | -----                               |
| Sec6.I N                           |                 | -----                               | 3.011                               | -----                               | -----                               |
| Cys6.I N                           |                 | -----                               | -----                               | 3.002                               | -----                               |
| Thr7.I N                           | Gln11.I OE1     | 2.767                               | 2.685                               | 2.706                               | 3.077                               |
| Thr7.I OG1                         | Gln11.I OE1     | 3.454                               | -----                               | -----                               | -----                               |
| Glu8.I N                           | Gln11.I OE1     | 3.406                               | -----                               | -----                               | -----                               |
| Gly10.I N                          | Sec28.I O       | 2.738                               | -----                               | -----                               | -----                               |
|                                    | Cys28.I O       | -----                               | 2.930                               | 3.116                               | 2.937                               |
| Gln11.I NE2                        | Thr7.I OG1      | 3.317                               | 3.042                               | -----                               | 3.171                               |
| Gln11.I N                          | Glu8.I O        | 3.287                               | -----                               | -----                               | -----                               |
| Asn12.I N                          | Thr45.I O       | 2.881                               | 2.802                               | 2.711                               | 2.759                               |
| Asn12.I ND2                        | Gly23.I O       | -----                               | 3.468                               | 3.043                               | -----                               |
| Asn12.I ND2                        | Asn26.I O       | 2.977                               | 2.929                               | 2.813                               | 2.880                               |
| Asn12.I ND2                        | Gly44.I O       | -----                               | -----                               | 3.424                               | -----                               |
| Leu13.I N                          | Cys22.I O       | 2.806                               | 2.666                               | -----                               | -----                               |
|                                    | Sec22.I O       | -----                               | -----                               | 2.697                               | -----                               |
| Leu15.I N                          | Thr4.I O        | 2.741                               | 2.689                               | 2.908                               | 2.814                               |
| Sec16.I N                          | Asn20.I O       | 3.090                               | -----                               | -----                               | -----                               |
| Cys16.I N                          |                 |                                     |                                     |                                     |                                     |

|             |             |       |       |       |       |
|-------------|-------------|-------|-------|-------|-------|
|             |             | ----- | 3.206 | 3.099 | 3.197 |
| Asn20.I N   | Glu17.I O   | 3.203 | 3.085 | 2.958 | ----- |
| Asn20.I ND2 | Glu17.I O   | 2.894 | 2.806 | 2.711 | ----- |
| Cys22.I N   | Cys14.I O   | 2.862 | ----- | ----- | ----- |
| Cys22.I N   | Sec14.I O   | ----- | 2.820 | ----- | ----- |
| Sec22.I N   | Cys14.I O   | ----- | ----- | 2.675 | ----- |
| Cys22.I N   | Cys14.I O   | ----- | ----- | ----- | 2.467 |
| Asn26.I N   | Gly23.I O   | 3.098 | 3.173 | ----- | ----- |
| Asn26.I ND2 | Gly23.I O   | 3.307 | 3.439 | ----- | ----- |
| Asn26.I ND2 | Gln24.I O   | 3.332 | 3.066 | ----- | ----- |
| Lys27.I N   | Val40.I O   | 2.799 | 2.734 | 2.676 | 2.713 |
| Lys27.I NZ  | Thr41.I O   | ----- | ----- | ----- | 2.984 |
| Sec28.I N   | Gln11.I O   | 2.932 | ----- | ----- | ----- |
| Cys28.I N   |             | ----- | 2.955 | 2.925 | 2.937 |
| Ile29.I N   | Gln38.I O   | 2.743 | 2.671 | 2.721 | 2.947 |
| Leu30.I N   | Ser9.I OG   | 2.858 | 2.859 | 3.052 | ----- |
| Gly31.I N   | Asn37.I OD1 | 2.791 | 2.776 | 2.854 | 3.401 |
| Ser32.I N   | Glu35.I OE2 | 2.589 | 2.907 | 3.264 | ----- |
| Ser32.I OG  | Glu35.I OE2 | 3.188 | 2.634 | ----- | ----- |
| Glu35.I N   | Ser32.I O   | ----- | ----- | ----- | 3.139 |
| Glu35.I N   | Ser32.I O   | 2.908 | 3.025 | ----- | ----- |
| Asn37.I ND2 | Sec16.I O   | 2.980 | ----- | ----- | ----- |
|             | Cys16.I O   | ----- | 3.157 | 2.971 | 3.486 |
| Gln38.I N   | Ile29.I O   | 3.027 | 2.960 | 3.017 | 2.942 |
| Cys39.I N   | Glu17.I OE2 | 2.814 | 2.767 | ----- | ----- |

|             |             |       |       |       |       |
|-------------|-------------|-------|-------|-------|-------|
| Sec39.I N   |             | ----- | ----- | 2.767 | ----- |
| Val40.I N   | Lys27.I O   | 2.932 | 2.735 | 2.758 | 2.764 |
| Gly42.I N   | Gly25.I O   | 2.944 | 2.988 | 2.920 | 2.998 |
| Thr45.I N   | Gly10.I O   | 2.930 | 2.905 | 2.710 | ----- |
| Lys47.I N   | Asn12.I O   | 2.942 | 2.998 | 3.025 | ----- |
| Lys47.I NZ  | Thr4.I OG1  | 2.764 | 2.499 | 2.626 | 3.090 |
| Lys47.I NZ  | Asp5.I O    | 2.726 | 2.999 | 2.769 | 2.588 |
| Ser50.I N   | Gln49.I OE1 | ----- | ----- | ----- | 3.042 |
| Ser50.I OG  | Trp45D.H O  | ----- | ----- | ----- | 3.485 |
| Ser50.I OG  | Gln49.I O   | ----- | ----- | ----- | 2.783 |
| Asp53.I N   | His51.I O   | ----- | ----- | 2.699 |       |
| Asp55.I N   | Asp53.I OD1 | 2.980 | ----- | ----- | ----- |
| Glu62.I N   | Glu62.I OE1 | 2.811 | ----- | ----- | ----- |
| Tyr63.I N   | Pro60.I O   | 3.376 | 3.146 | 3.293 | ----- |
| Leu64.I N   | Glu61.I O   | ----- | ----- | 3.077 | ----- |
| Gln65.I NE2 | Gln65.I OXT | ----- | ----- | ----- | 3.187 |
| Gln65.I N   | Glu61.I O   | ----- | ----- | 3.118 | ----- |

470

471 A closer look at this H-bonding analysis indicated that within the network that holds together the core  
472 of the hirudin molecule there is a specific "cluster" of several tight intramolecular hydrogen bonds,  
473 which seem to contribute the most to the robust conformation of this core (**Figure S17**). Interestingly,  
474 this H-bonding cluster is located all around the disulfide (or diselenide) bond between residues 6 and  
475 14. This cluster includes mainly the hydrogen bonds between Thr4-Lys47, Asp5-Lys47, Thr7-Gln11,  
476 Asn12-Gly23, Asn12-Asn26, Asn12-Lys47 and Leu15-Thr4, which seem to be the most significant  
477 intramolecular interactions of the hirudin core. A focus on this central H-bonding cluster (in Complex-  
478 2) is shown in **Figure S17**, and a complementary comparison between these clusters in the Se-Hir  
479 structures of Complex-1 and Complex-2 is shown in Table S4, where the specific H-bonds and their

480 corresponding differences are listed. Both Figure S17 and Table S4 emphasize the central role of Lys47  
 481 in the stabilization of the core structure of the hirudin protein, as well as in holding its N-terminal and  
 482 C-terminal emanating peptides in their specific directions. These results are reinforced by previous  
 483 studies which showed that the hydrogen bonds formed by the side-chain amino group of Lys47 with the  
 484 backbone carbonyl oxygen of Asp5 and the side-chain O atom of Thr4 help to position the N-terminal  
 485 of hirudin in the active-site cleft.<sup>[18]</sup> Nevertheless, site directed mutagenesis experiments failed to  
 486 demonstrate a crucial role for Lys47, or any of the other basic residues in the C-terminal peptide of  
 487 hirudin on its inhibitory potency, since such inhibition was only slightly decreased when Lys47 was  
 488 replaced with other amino acids.<sup>[18]</sup>

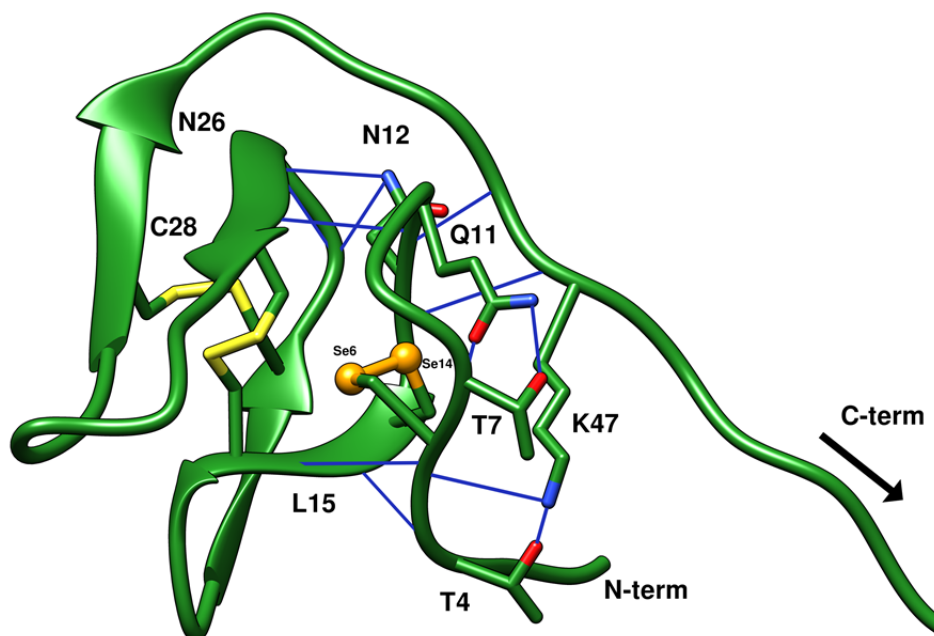

489  
 490 **Figure S17.** A close-up on the core of Hir(C6U/C14U), in its bound form with thrombin. The 6–14  
 491 diselenide bond is marked in *gold* and the cluster of H-bonds around it is shown in *blue*. Most of the Se-  
 492 Hir residues participating in these H-bonds are labeled and their interacting side-chains are shown.

493

494

495

496

497 **Table S4.** Distances within the cluster of conserved hydrogen bonds in the cores of the  
498 Hir(C16U/C28U)-thrombin complex and Hir(C6U/C14U)-thrombin complex

| Donor                | Acceptor            | Hir(C16U/C28U) | Hir(C6U/C14U) | $\Delta$ D1-D2 (Å) |
|----------------------|---------------------|----------------|---------------|--------------------|
|                      |                     | D--A (Å)       | D--A (Å)      |                    |
| Cys6.I N/Sec6        | Leu15.I O           | 2.966          | 3.011         | -0.045             |
| Thr7.I N             | Gln11.I OE1         | 2.767          | 2.685         | 0.082              |
| Thr7.I OG1           | Gln11.I OE1         | 3.454          | 3.415         | 0.039              |
| Asn12.I N            | Thr45.I O           | 2.881          | 2.802         | 0.079              |
| Asn12.I ND2          | Gly23.I O           | 3.783          | 3.468         | 0.315              |
| Asn12.I ND2          | Asn26.I O           | 2.977          | 2.929         | 0.048              |
| Leu13.I N            | Cys22.I O           | 2.806          | 2.666         | 0.140              |
| Leu15.I N            | Thr4.I O            | 2.741          | 2.689         | 0.052              |
| Sec16.I N/ Cys16.I N | Asn20.I O           | 3.090          | 3.206         | -0.116             |
| Cys22.I N            | Cys14.I O/Sec14.I O | 2.862          | 2.820         | 0.042              |
| Sec28.I N/ Cys28.I N | Gln11.I O           | 2.932          | 2.955         | -0.023             |
| Lys47.I N            | Asn12.I O           | 2.942          | 2.998         | -0.056             |
| Lys47.I NZ           | Thr4.I OG1          | 2.764          | 2.499         | 0.265              |
| Lys47.I NZ           | Asp5.I O            | 2.726          | 2.999         | -0.273             |

499

#### 500 4.4.4.4. Intermolecular hydrogen bonds between the Se-Hir analogs and Thrombin

501 We next analyzed the intermolecular hydrogen bonds that are involved in forming the current Se-Hir-  
502 Thrombin complexes, in an attempt to locate potential differences in the observed hirudin-thrombin  
503 interactions. As for the intramolecular H-bonding interactions within the Se-Hir analogs, the presence  
504 of a potential intermolecular hydrogen bond was determined with the *Chimera* software<sup>[19]</sup>, using a  
505 relatively generous cutoff criterion for the distance (3.6 Å) between the potential donor and acceptor  
506 (**Table S5**).

507 **Table S5.** Intermolecular hydrogen-bonding interactions between thrombin and the bound Se-Hir  
508 analogs, compared to the corresponding interactions in the reported WT-Hir-thrombin complex (PDB  
509 ID: 1HRT)

| <i>Hydrogen bonds (amino acids)</i> |                          | <i>Hir(C16U/C28U)</i><br><i>-Thrombin</i> | <i>Hir(C6U/C14U)</i><br><i>-Thrombin</i> | <i>Hir(C22U/C39U)</i><br><i>-Thrombin</i> | <i>WT-Hir-</i><br><i>Thrombin</i>   |
|-------------------------------------|--------------------------|-------------------------------------------|------------------------------------------|-------------------------------------------|-------------------------------------|
| <i>Donor/Acceptor</i>               | <i>Acceptor/Acceptor</i> | <i>Distance (Å)</i><br><i>D...A</i>       | <i>Distance (Å)</i><br><i>D...A</i>      | <i>Distance (Å)</i><br><i>D...A</i>       | <i>Distance (Å)</i><br><i>D...A</i> |
| Ser205.H OG<br>(acceptor)           | Val1.I N (donor)         | 3.122                                     | -----                                    | -----                                     | -----                               |
| His43.H NE2<br>(acceptor)           |                          | -----                                     | 3.160                                    | -----                                     | -----                               |
| His43.H NE2<br>(acceptor)           |                          | -----                                     | -----                                    | 3.081                                     | -----                               |
| Ser226.H O<br>(acceptor)            | Val1.I N (donor)         | 2.908                                     | 2.765                                    | 2.746                                     | 2.795                               |
| Gly228.H N                          | Val1.I O                 | 3.159                                     | 3.260                                    | 3.401                                     | 2.735                               |
| Gly228.H O<br>(acceptor)            | Tyr3.I N (donor)         | 2.934                                     | 2.946                                    | 3.018                                     | 2.702                               |
| Gly230.H N                          | Tyr3.I O                 | 2.844                                     | 2.773                                    | 2.814                                     | -----                               |
| Asn95.H OD1<br>(acceptor)           | Tyr3.I OH (donor)        | 2.657                                     | 2.948                                    | 2.526                                     | -----                               |
| Arg233.H NH2                        | Asp5.I OD1               | 3.013                                     | 3.003                                    | 3.082                                     | 2.785                               |
| Arg178.H NH2                        | Glu17.I OE1              | -----                                     | -----                                    | -----                                     | 3.537                               |
| Arg233.H NH1                        | Ser19.I OG               | 2.885                                     | 3.059                                    | 3.232                                     | -----                               |
|                                     | Asp5.I OD1               | -----                                     | -----                                    | -----                                     | 3.100                               |
| Lys236.H NZ                         | Ser19.I O                | 3.132                                     | 3.001                                    | 3.092                                     | 3.138                               |
| Lys236.H NZ                         | Asn20.I OD1              | -----                                     | -----                                    | -----                                     | 3.379                               |
| Glu229.H OE1<br>(acceptor)          | Val21.I N (donor)        | -----                                     | -----                                    | -----                                     | 3.407                               |
| Glu229.H OE2<br>(acceptor)          | Val21.I N (donor)        | 2.819                                     | 2.652                                    | 2.775                                     | 3.108                               |
| Trp50.H NE1                         | Lys47.I O                | 2.993                                     | 3.059                                    | 3.244                                     | -----                               |
| Lys52.H NZ                          | Gln49.I OE1              | 3.196                                     | -----                                    | -----                                     | -----                               |
| Arg20.H NH2                         | Ser50.I O                | -----                                     | -----                                    | -----                                     | 3.520                               |
| Trp50.H O<br>(acceptor)             | Ser50.I OG (donor)       | -----                                     | -----                                    | -----                                     | 3.485                               |
| Glu25.H OE2<br>(acceptor)           | Asn52.I ND2<br>(donor)   | 2.687                                     | -----                                    | -----                                     | -----                               |

|                           |                   |       |       |       |       |
|---------------------------|-------------------|-------|-------|-------|-------|
| Asn143.H ND2              | Asn52.I OD1       | ----- | ----- | ----- | 3.435 |
| Leu26.H N                 | Asp53.I O         | 2.732 | 2.718 | ----- | ----- |
| Arg68.H NH1               | Asp53.I OD2       | 2.509 | ----- | ----- | ----- |
|                           | Asp53.I OD1       | ----- | ----- | ----- | 2.524 |
| Arg68.H NH2               | Asp53.I OD1       | 2.949 | ----- | ----- | ----- |
| Arg68.H NH2               | Asp 53.I OD2      | 3.089 | ----- | ----- | ----- |
| Arg68.H NH2               | Asp55.I O         | 3.069 | ----- | ----- | ----- |
| Gln24.H OE1<br>(acceptor) | Phe56.I N (donor) | ----- | ----- | ----- | 3.187 |
| Tyr71.H N                 | Glu57.I OE2       | ----- | 3.224 | ----- | ----- |
| Gln24.H NE2               | Ile59.I O         | 3.615 | ----- | ----- | ----- |
| Gln24.H OE1<br>(acceptor) | Ile59.I N (donor) | 2.967 | ----- | ----- | ----- |

510

511 In general, the analysis showed that all three complexes (Complex-1-3) contained similar  
512 intermolecular hydrogen bonding patterns between the thrombin protein and the bound Se-Hir analogs,  
513 confirming the generally similar biological activities observed. Interestingly, however, the analysis  
514 indicated that the Hir(C16U/C28U) in Complex-1 forms slightly more hydrogen bonds compared to the  
515 other two derivatives, and especially those formed between Gln24.H and Ile59.I, Lys52.H and Gln49.I,  
516 Arg68.H and Asp53.I, Arg68.H and Asp55.I, and between Asn52.I and Glu25.H (where H refers to the  
517 heavy chain of thrombin, and I refers to the Se-Hir analog (Inhibitor) of complex-1). Obviously, it is  
518 possible that these additional H-bonds could be identified due to the higher resolution of Complex-1  
519 (1.6 Å) compared to Complex-3 (2.7 Å), yet their systematic absence in Complex-2 (of the comparable  
520 resolution of 1.9 Å) may account, at least in part, for the slightly higher affinity to thrombin of  
521 Hir(C16U/C28U) as compared to Hir(C6U/C14U). This statement is supported by the fact that one of  
522 these additional H-bonds (Arg68.H to Asp53.I) is also identified in the thrombin complex of WT-Hir,  
523 which shows inhibition parameters similar to Hir(C16U/C28U).

524 Another intermolecular interaction between hirudin and thrombin that could be significant for both  
525 affinity and inhibition is that of the N-terminal residue, Val1, in hirudin. The positively charged

(terminal) amino group of this residue forms an important H-bond with specific residues in the active site of thrombin, thereby blocking the active site and contributing a critical factor to its inhibition. In all of the current complexes Val1 forms hydrogen bonds with Ser226 and Gly228 of thrombin. However, in Complex-1 it also forms a key H-bond with Ser205 of thrombin, the catalytic nucleophile of the hydrolytic reaction (related to the classical Ser195 in serine proteases). In Complex-2 this H-bond is not observed and is replaced with an alternative H-bond with His43, which is likely to be less important for inhibition. This finding is in correlation with previous observations in regards to WT-Hir, pointing out that the amino-terminus group of a bound hirudin forms H-bonds with the thrombin residues Ser205 and Ser226 (the equivalents for the classical residues Ser195 and Ser214), and as such presents the only positively-charged group of hirudin that interacts directly with the target thrombin. This role of Val1 was further reinforced by a removal of the positive charge of the amino-terminus moiety by its chemical acetylation, which reduced significantly the binding energy of the modified hirudin to thrombin (by  $\sim 23 \text{ kJ}\cdot\text{mol}^{-1}$ ).<sup>[18]</sup>

539

#### 4.4.4.5. RMS deviation by residue

Another form of comparison between the three current structures is to superimpose each pair of them and then analyze the RMS deviation (RMSD) per residue. Such analysis was done for the Se-Hir analogs in Complex-1 and Complex-2, being the most reliable structures at the highest resolution among the four related structures discussed here. This analysis is presented in Figure S18, where the plots of the RMSD-per-residue are based only on the  $\text{Ca}$  atoms of the residues, on the backbone atoms, or on all atoms of the residue (including the side chains). As expected, very small RMSDs are observed for the  $\text{Ca}$ 's and the backbone atoms, confirming again that the two compared Se-Hir analogs are nearly identical in terms of the overall conformation and the secondary-structure elements, except for the obvious deviation observed for the flexible peptide segment (residues 49-65) at the C-terminal part of the bound hirudin. Interestingly, the RMSD plot that is based on the full residues, shows some significant local deviations, in the conformation and/or direction of the side-chain of specific residue. Such deviations are observed for the side chains of residues Val1, Glu8, Gln24, Lys27, Ile29, Ser32, Asp33, Glu35, Gln38 and Glu43 (**Figure S18**). In the case of Val1, the different conformation of the residue causes a different positioning of its N-terminal amino moiety, which leads to different interactions with the thrombin active site (*vide supra*). Nevertheless, a close examination of the other

556 deviating residues shows that their side-chains are not involved in either intra- or intermolecular  
557 interactions with the target thrombin,

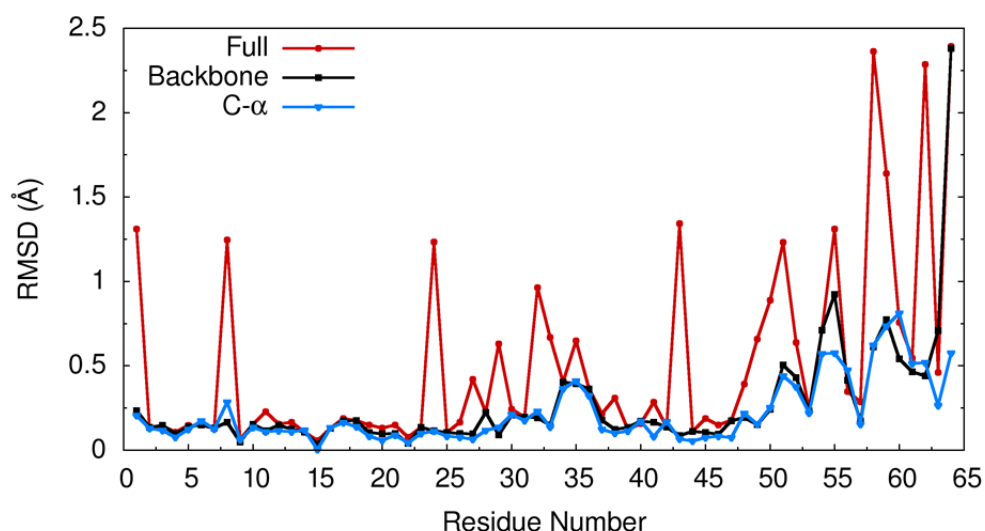

558

559 **Figure S18.** RMSD values between the Hir(C16U/C28U) and Hir(C6U/C14U) in complex with  
560 thrombin, respectively, plotted based only on the C $\alpha$  atoms of the residues (*blue*), only on the backbone  
561 atoms (*black*), or based on all atoms of the residue (*red*).

562

#### 563 4.4.4.6. Implications of the observed structural differences

564 The detailed structural analysis of the three Se-Hir derivatives presented here confirmed unequivocally  
565 that all three derivatives adopted the same overall conformation as WT-Hir, at least in their bound  
566 forms to the thrombin target. Such confirmation is not trivial, considering the replacement of a different  
567 disulfide bond with a diselenide bond in each of them, as well as the differences observed in their  
568 elution time from HPLC, and their inhibition parameters. The difference was more significant with the  
569 Hir(C6U/C14U) analog, compared to the two other Se-Hir analogs and to WT-Hir, emphasizing that  
570 this analog behaves differently. In this respect, all four hirudin analogs examined here turned out to be  
571 remarkably similar in their overall structure.

572 Despite the different crystallographic resolutions observed of the complexes, the overall structure and  
573 global conformation of all four complexes examined here are nearly identical. Yet, for more reliable  
574 comparisons, one should consider primarily the two structures determined in the highest and  
575 comparable resolutions, Complex-1 and Complex-2 (determined here at 1.6 Å and 1.9 Å resolution,

576 respectively). In this respect, Complex-1 could be considered as a general representative of both  
577 Complex-3 and the WT-Hir-thrombin complex, all of which showed indeed comparable properties. As  
578 such a comprehensive structural comparison was therefore performed on all four complexes, yet  
579 focusing mainly on Complex-1 and Complex-2. These analyses included comparisons between  
580 intramolecular hydrogen bonds, intermolecular interactions with the target thrombin and local  
581 conformational differences per residue. The intermolecular H-bonding between the Se-Hir analogs and  
582 thrombin did not identify any significant changes in bonding that are missing or present in any of the  
583 structures, except for the one case involving the critical amino-terminus group of Val1. This group,  
584 which is likely to be positively charged at neutral pH, makes a slightly different interaction with the  
585 active site of thrombin, hydrogen bonding to thrombin Ser205 in Complex-1 while hydrogen bonding  
586 to thrombin His43 in Complex-2. In both cases, the hydrogen bond do not seem to be very strong, yet it  
587 is probably sufficiently different to lead to the altered binding affinity and inhibition observed for  
588 Hir(C16U/C28U), as compared to Hir(C6U/C14U). This change in the conformation of Val1 in  
589 Hir(C6U/C14U) is likely a result of the modification of the nearby 6–14 disulfide into a diselenide  
590 bond, as further discussed below.

591 Examination of the intramolecular hydrogen bonds within the Se-Hir structures presented here,  
592 demonstrated that they are all quite similar compared to the thrombin-bound form of WT-Hir.  
593 Nevertheless, a closer look onto the hirudin globular core showed a tight and conserved network of  
594 hydrogen bonds, clustered around residue 6 (Cys/Sec6) in all of the structures compared. Although  
595 conserved in all four structures, this clustered network is slightly different in the Hir(C6U/C14U)  
596 analog, mainly as a result of the slightly longer 6–14 diselenide bond, which is a disulfide bond in all  
597 the other hirudin analogs. Within this tight H-bonding network (**Figure S17**), it seems that the specific  
598 hydrogen bonds that Lys47 forms to Asp5 and Thr4, could have a crucial role in positioning the N-  
599 terminal peptide of hirudin (residues 1-4) in the active site cleft of thrombin. Moreover, since Asp5 and  
600 Thr4 of hirudin are adjacent to the modified residue (Cys/Sec) at position 6, even a slight difference in  
601 this segment could lead to altered flexibility, orientation and/or binding capability of this N-terminal  
602 peptide. Such a conformational effect may also lead, directly or indirectly, to the slightly different  
603 conformation of Val1, located at the free N-terminal end of this peptide.

604 In retrospect, the tight cluster of intramolecular hydrogen bonds discussed above may account for the  
605 robust structure of the hirudin molecule, and the fact that relatively small changes are observed in the

606 overall structures of the different Se-Hir analogs. Additionally, the location of this cluster close to the  
607 hirudin-thrombin interface, and around the 6–14 disulfide/diselenide bond, may explain why the  
608 specific replacement of this bond in the Hir(C6U/C14U) analog made more significant changes in its  
609 properties, as compared to both Hir(C16U/C28U) and Hir(C22U/C39U), and WT-Hir. Further, the  
610 important cluster of intramolecular hydrogen bonds around the 6–14 disulfide further supports its  
611 crucial role in the folding mechanism of this protein, explaining, at least in part, the different folding  
612 process observed for the Hir(C6U/C14U).

613

#### 614 **4.5. 2D-NMR of WT-Hir, Hir(C6U/C14U) and Hir(C6U/C16U)**

615 WT-Hir, Hir(C6U/C14U) and Hir(C6U/C16U) samples were all prepared with identical conditions.  
616 Proteins were dissolved in 320  $\mu$ L of 10% D<sub>2</sub>O in filtered TDW where the pH was adjusted to 4.5  
617 using solutions of 0.5 M NaOH and 0.1 M HCl. The final ionic strength was approximately 7 mM for  
618 all samples. The final concentration of WT-Hir was 1.44 mM, Hir(C6U/C14U) was 1.41 mM and  
619 Hir(C6U/C16U) was 0.6 mM.

620 The experiments were performed under identical conditions on a Bruker AVII 500 MHz spectrometer  
621 operating at a proton frequency of 500.13 MHz, using a 5-mm selective probe equipped with a self-  
622 shielded XYZ-gradient coil at 18.2 °C. Phase sensitive double quantum filtered correlation  
623 spectroscopy (DQF-COSY) experiments<sup>[20]</sup> were acquired using gradients for water saturation. Spectra  
624 were processed, analyzed and presented with TopSpin (Bruker Analytische Messtechnik GmbH) and  
625 NMRFAM SPARKY software.<sup>[21]</sup>

626

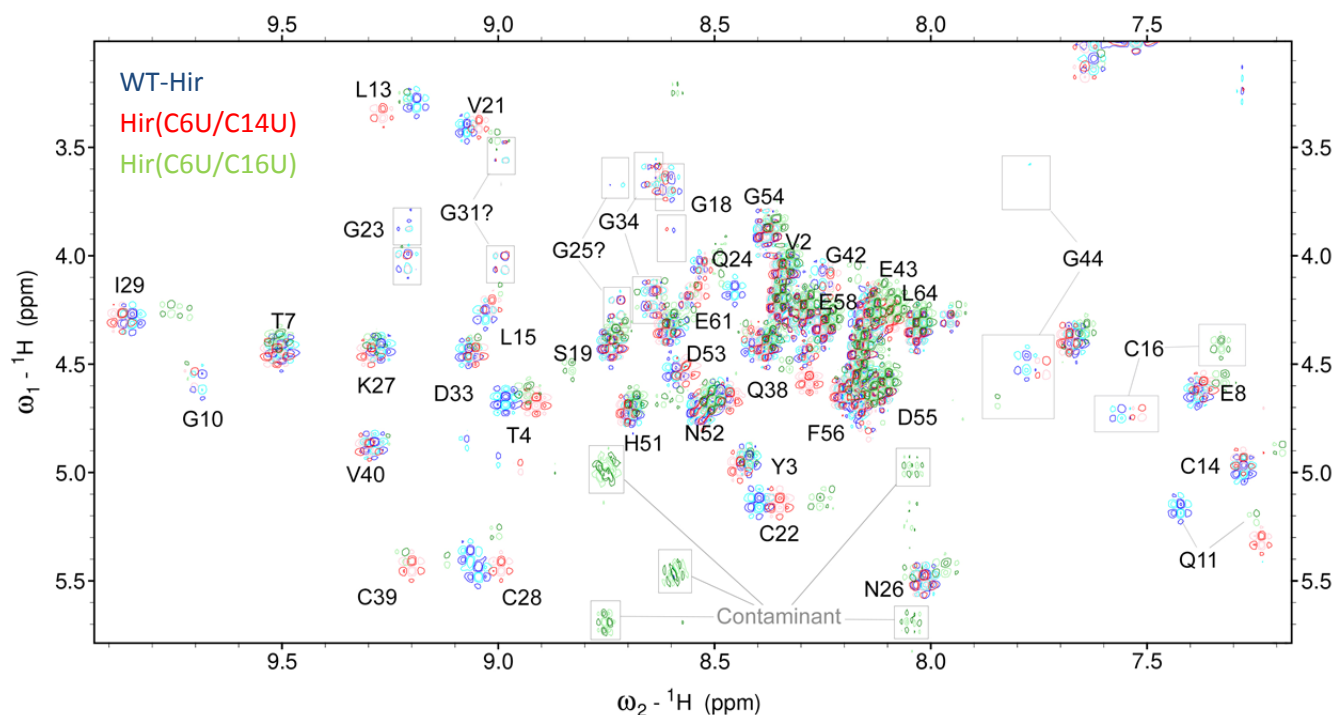

**Figure S19.** NMR analysis of changes in chemical shift of WT-Hir, Hir(C6U/C14U) and Hir(C6U/C16U). The fingerprint region of NMR COSY spectrum of of Hir(C6U/C14U) (in red) and Hir(C6U/C16U) (in green) overlaid on that of WT-Hir (in blue) showing signals that can be unambiguously assigned according to ref. 22.<sup>[22]</sup> A contaminant in Hir(C6U/C16U) (green), identified by 1D intensities, could not be separated and is noted.

#### 4.6. Inhibition assays

Thrombin activity was assayed in Tris-HCl buffer (50 mM, 154 mM CaCl<sub>2</sub>, 0.2 % polyethylene glycol 6000, pH 8) at 37 °C.<sup>[23]</sup> Following pre-incubation of 184 pM of thrombin and inhibitor with a concentration varying between 0-3.7 nM in a total volume of 0.30 mL, the enzymatic reaction was started by the addition of 68.5 μM of N-(*p*-Tosyl)-Gly-Pro-Arg-*p*-nitroanilide (Tos-Gly-Pro-Arg-NH-Np). The initial rate of *p*-nitroaniline formation was followed at 405 nm ( $\epsilon_{405}=9920 \text{ cm}^{-1}\text{M}^{-1}$ ) using a Thermo Scientific Evolution<sup>TM</sup> 201 UV-Visible spectrophotometer. Protein concentration was determined by spectrophotometer ( $\epsilon_{280}$  of thrombin is  $72150 \text{ cm}^{-1}\text{M}^{-1}$ ;  $\epsilon_{280}$  of WT-Hir and its seleno-analogs is  $2560 \text{ cm}^{-1}\text{M}^{-1}$ ). The data were fitted to the following inhibition equation to calculate  $K_i$

$$v = \left(\frac{v_0}{2E}\right) \left[ \left( \sqrt{(K_i + I - E)^2 + 4K_i E} \right) - (K_i + I - E) \right]$$

644 The observed  $K_I$  values for WT-Hir ( $10.9 \pm 4.9$  pM), Hir(C16U/C28U) ( $10.0 \pm 3.7$  pM) and  
645 Hir(C22U/C39U) ( $12.5 \pm 2.9$  pM ) are practically identical within experimental error and with  
646 excellent agreement with previous literature (10 pM).<sup>[23]</sup> However the  $K_I$  values obtained for  
647 Hir(C6U/C14U) ( $K_I = 192.4 \pm 21.9$  pM) and Hir(C6U/C16U) ( $K_I = 104.9 \pm 15.0$  pM) were higher  
648 compared to WT-Hir and its native diselenide containing analogs. All data are shown in Figure 3b and  
649 summarized in Table 1 in the main text.

650

651

652

653

654

655

656

## 5. HR-MS results

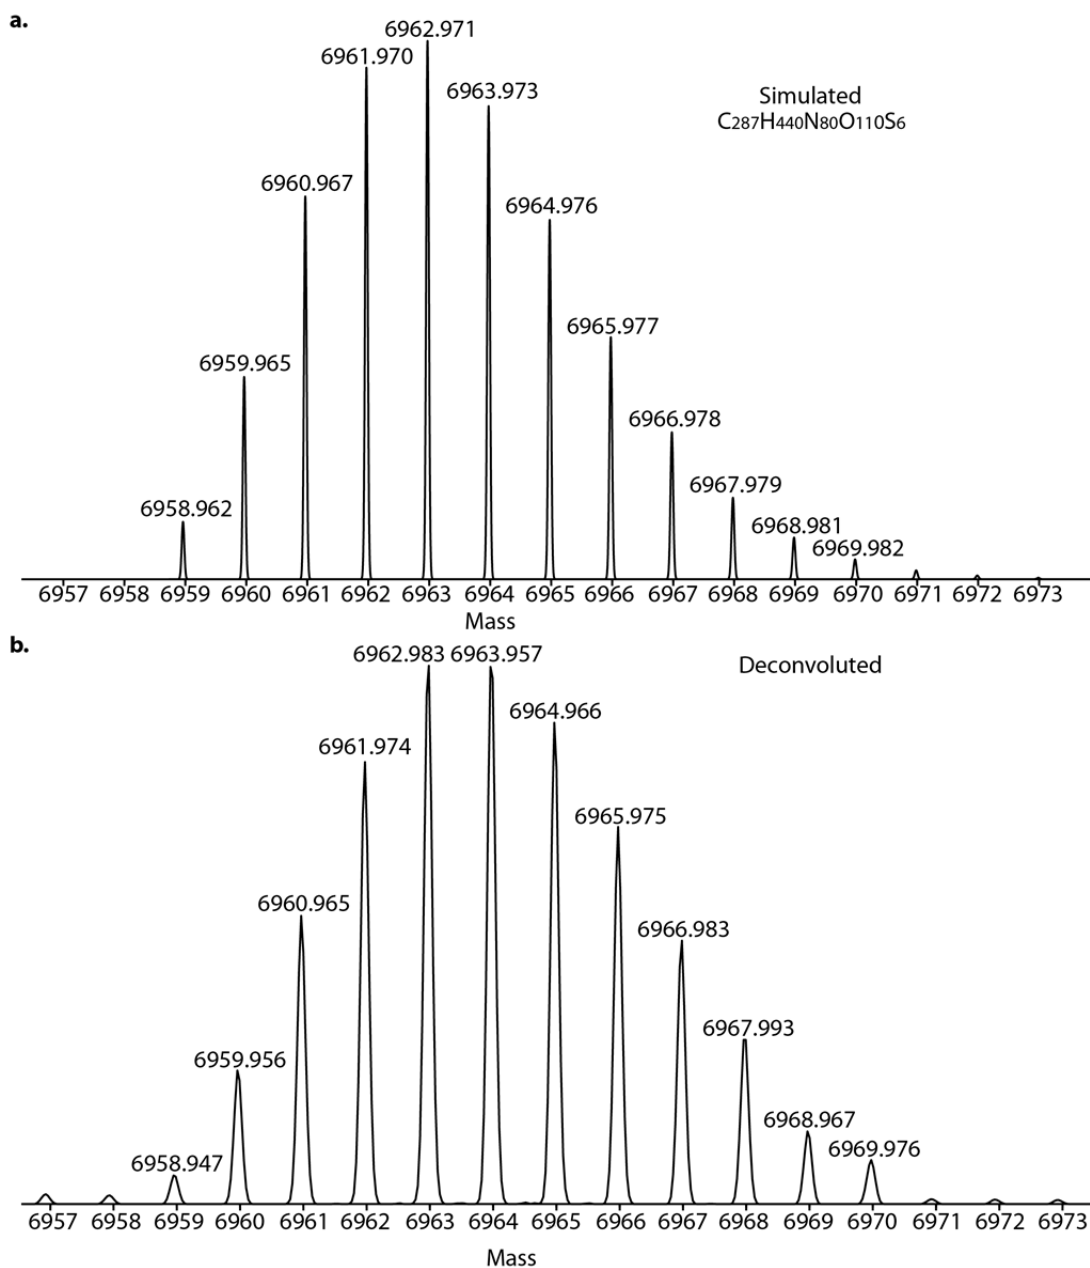

**Figure S20.** HR-MS analysis of WT-Hir. **a.** The simulated HR-MS of folded WT-Hir with chemical formula C<sub>287</sub>H<sub>440</sub>N<sub>80</sub>O<sub>110</sub>S<sub>6</sub> is shown; **b.** The deconvoluted HR-MS of WT-Hir.

a.

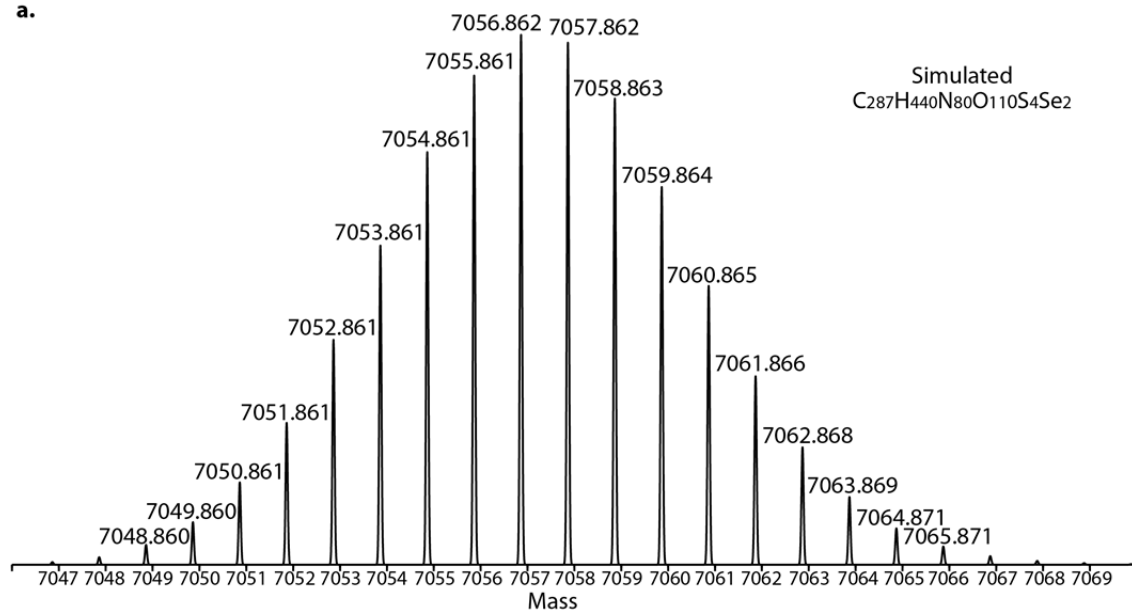

b.

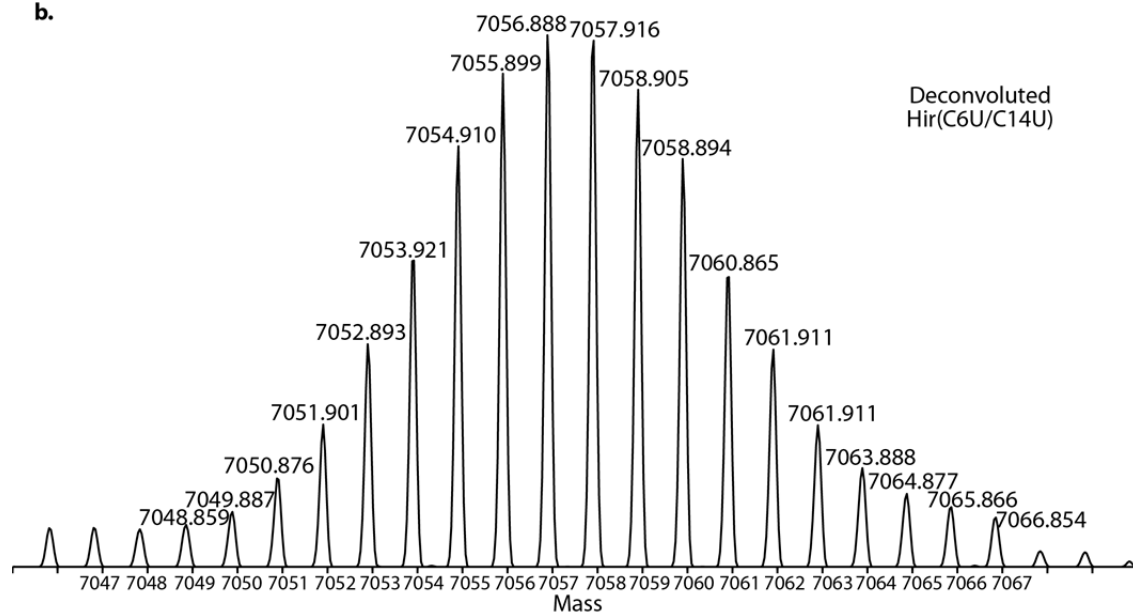

661

662

663

664

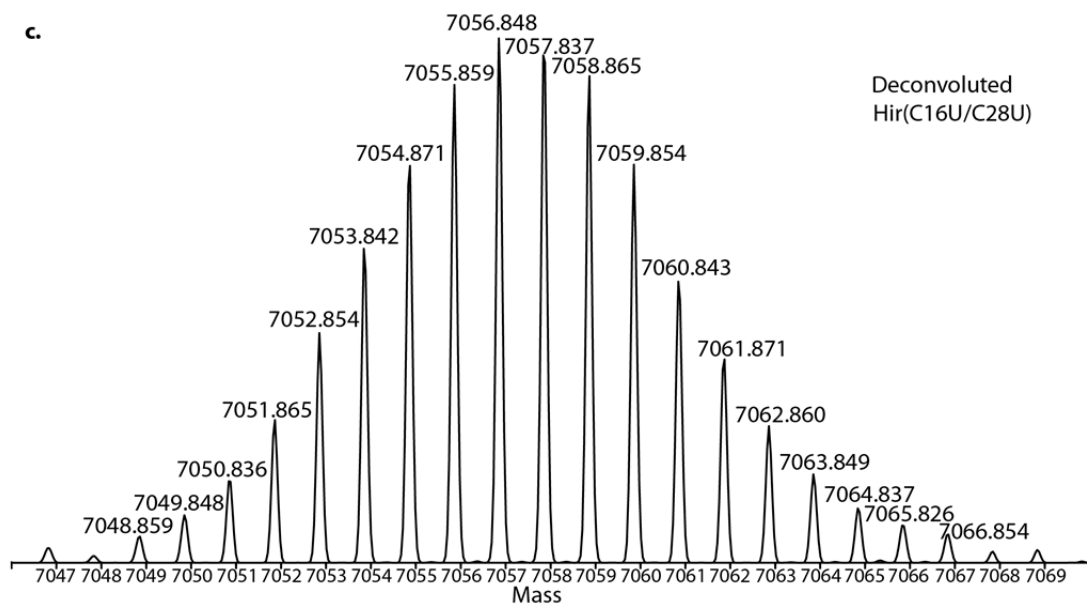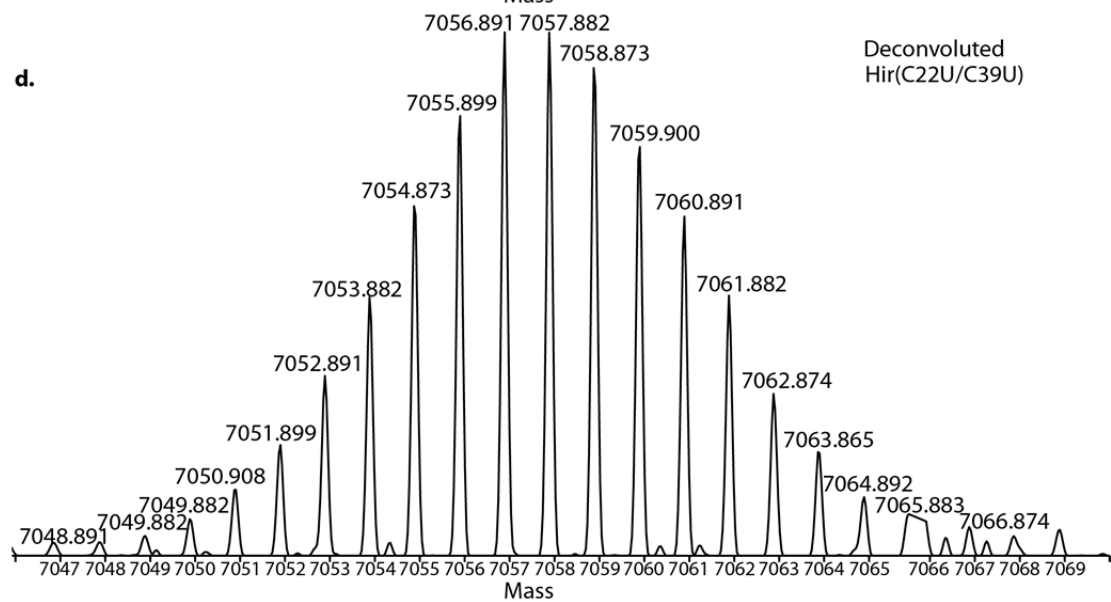

e.

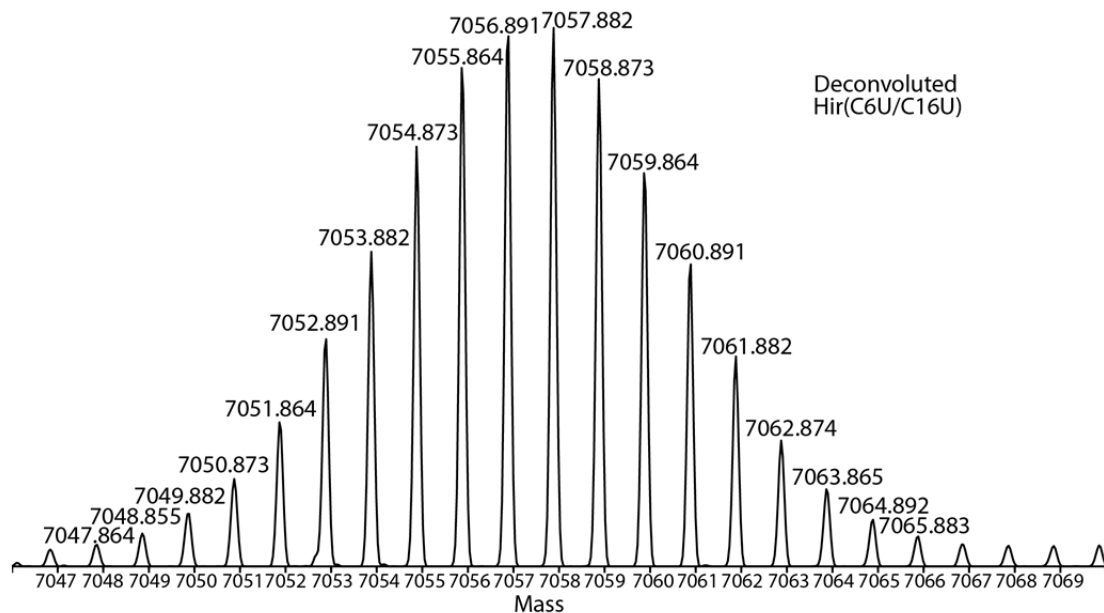

666

667 **Figure S21.** HR-MS analysis of Se-Hir analogs. **a.** The simulated HR-MS of folded diselenide  
 668 containing hirudin analogs, with the chemical formula  $C_{287}H_{440}N_{80}O_{110}S_4Se_2$  shown; The deconvoluted  
 669 HR-MS of **b.** Hir(C6U/C14U) **c.** Hir(C16U/C28U) **d.** Hir(C22U/C39U) and **e.** Hir(C6U/C16U), are  
 670 shown as well.

671

672

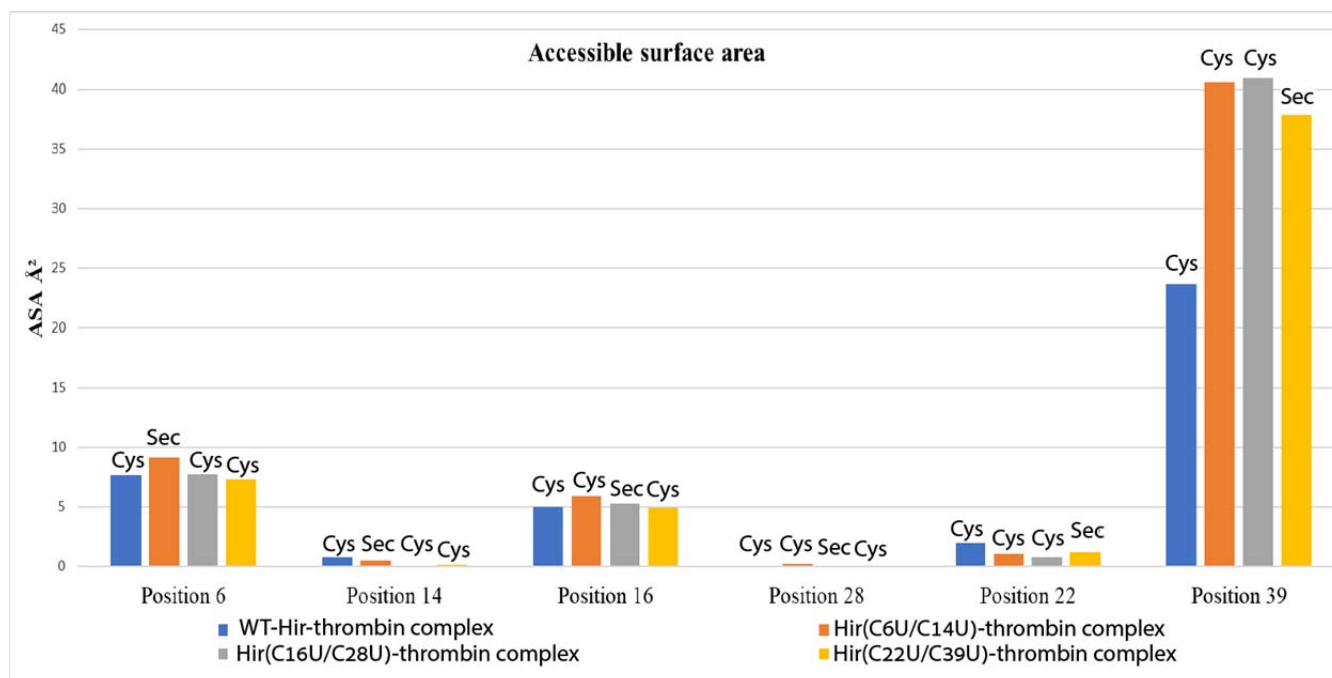

**Figure S22.** Solvent Accessible Surface Area (SASA) for all Cys and Sec residues in WT-Hir, Hir(C6U/C14U), Hir(C16U/C28U), and Hir(C22U/C39U), complexed with thrombin. The SASA calculations were performed for the Wild-type and the Se-Hirudin thrombin complexes using GETAREA webserver.<sup>[24]</sup> The calculations showed that both Cys and Sec residues at position 39 are the most exposed compared to positions 6, 14, 16, 22 and 28, of these, the residues at positions 14 and 28 are particularly buried. These calculations are reinforced with the experimental observation of longer HPLC retention time for Hir(C6U/C14U) and Hir(C6U/C16U) analogues. However, there was only a relatively small difference in the ASA between Cys and Sec at the four different positions and when compared to the maximal SASA of cysteine (102.3 Å<sup>2</sup>), given at the GETAREA server site, it appears that all the Cys/Sec residues of hirudin are at least somewhat buried.

## Supplementray references

- [1] P. S. Reddy, S. Dery, N. Metanis, *Angew Chem Int Edit* **2016**, *55*, 992-995.
- [2] P. t. Hart, L. H. J. Kleijn, G. de Bruin, S. F. Oppedijk, J. Kemmink, N. I. Martin, *Org. Biomol. Chem.* **2014**, *12*, 913-918.
- [3] M. D. Gieselman, L. Xie, W. A. van der Donk, *Org. Lett.* **2001**, *3*, 1331-1334.
- [4] J. S. Zheng, S. Tang, Y. K. Qi, Z. P. Wang, L. Liu, *Nat. Protoc.* **2013**, *8*, 2483-2495.
- [5] A. L. Schroll, R. J. Hondal, S. Flemer, *J Pept Sci* **2012**, *18*, 1-9.
- [6] D. T. Flood, J. C. J. Hintzen, M. J. Bird, P. A. Cistrone, J. S. Chen, P. E. Dawson, *Angew Chem Int Edit* **2018**, *57*, 11634-11639.
- [7] J. B. Blanco-Canosa, P. E. Dawson, *Angew. Chem. Int. Ed.* **2008**, *47*, 6851-6855.
- [8] B. Chatrenet, J. Y. Chang, *J. Biol. Chem.* **1993**, *268*, 20988-20996.
- [9] G. Winter, D. G. Waterman, J. M. Parkhurst, A. S. Brewster, R. J. Gildea, M. Gerstel, L. Fuentes-Montero, M. Vollmar, T. Michels-Clark, I. D. Young, N. K. Sauter, G. Evans, *Acta Crystallogr D* **2018**, *74*, 85-97.
- [10] P. R. Evans, G. N. Murshudov, *Acta Crystallographica Section D-Biological Crystallography* **2013**, *69*, 1204-1214.
- [11] L. Potterton, J. Agirre, C. Ballard, K. Cowtan, E. Dodson, P. R. Evans, H. T. Jenkins, R. Keegan, E. Krissinel, K. Stevenson, A. Lebedev, S. J. McNicholas, R. A. Nicholls, M. Noble, N. S. Pannu, C. Roth, G. Sheldrick, P. Skubak, J. Turkenburg, V. Uski, F. von Delft, D. Waterman, K. Wilson, M. Winn, M. Wojdyr, *Acta Crystallogr D* **2018**, *74*, 68-84.
- [12] A. J. McCoy, R. W. Grosse-Kunstleve, P. D. Adams, M. D. Winn, L. C. Storoni, R. J. Read, *J Appl Crystallogr* **2007**, *40*, 658-674.
- [13] J. Vitali, P. D. Martin, M. G. Malkowski, W. D. Robertson, J. B. Lazar, R. C. Winant, P. H. Johnson, B. F. P. Edwards, *J Biol Chem* **1992**, *267*, 17670-17678.
- [14] P. Emsley, B. Lohkamp, W. G. Scott, K. Cowtan, *Acta Crystallographica Section D-Biological Crystallography* **2010**, *66*, 486-501.
- [15] O. Kovalevskiy, R. A. Nicholls, F. Long, A. Carlon, G. N. Murshudov, *Acta Crystallogr D* **2018**, *74*, 215-227.
- [16] W. Kabsch, *Acta Crystallographica Section D-Biological Crystallography* **2010**, *66*, 125-132.
- [17] C. J. Williams, J. J. Headd, N. W. Moriarty, M. G. Prisant, L. L. Videau, L. N. Deis, V. Verma, D. A. Keedy, B. J. Hintze, V. B. Chen, S. Jain, S. M. Lewis, W. B. Arendall, J. Snoeyink, P. D. Adams, S. C. Lovell, J. S. Richardson, D. C. Richardson, *Protein Sci* **2018**, *27*, 293-315.
- [18] M. Bauer, H. Brandstetter, D. Turk, J. Sturzebecher, W. Bode, *Semin Thromb Hemost* **1993**, *19*, 352-360.
- [19] E. F. Pettersen, T. D. Goddard, C. C. Huang, G. S. Couch, D. M. Greenblatt, E. C. Meng, T. E. Ferrin, *J Comput Chem* **2004**, *25*, 1605-1612.
- [20] M. Rance, O. W. Sorensen, G. Bodenhausen, G. Wagner, R. R. Ernst, K. Wuthrich, *Biochem Bioph Res Co* **1983**, *117*, 479-485.
- [21] W. Lee, M. Tonelli, J. L. Markley, *Bioinformatics* **2015**, *31*, 1325-1327.
- [22] H. Haruyama, K. Wuthrich, *Biochemistry-Us* **1989**, *28*, 4301-4312.
- [23] aA. Otto, R. Seckler, *Eur J Biochem* **1991**, *202*, 67-73; bS. R. Stone, J. Hofsteenge, *Biochemistry-Us* **1986**, *25*, 4622-4628.
